# Supplementary material for: Inferring mitochondrial and cytosolic metabolism by coupling isotope tracing and deconvolution
Source: PubMed Central journal article supplement (PMC10657349; doi:10.1038/s41467-023-42824-z), 2023-11-18
Supplement: 41467_2023_42824_MOESM1_ESM.pdf [file 41467_2023_42824_MOESM1_ESM.pdf]

## **Supplementary Information**

**Inferring mitochondrial and cytosolic metabolism by coupling isotope tracing and deconvolution**

Stern et al.

## Supplementary Figures

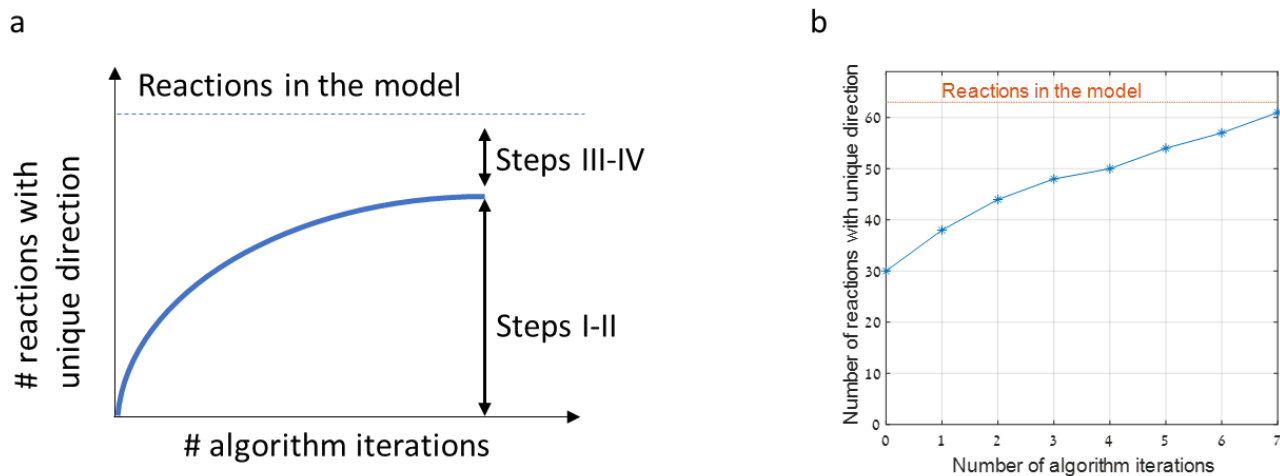

**Figure S1: Determining flux directionalities via CODE-MFA.** (a) Illustration of the number of reactions whose flux is uniquely determined throughout the different steps of CODE-MFA. (b) Number of reactions whose direction of net flux is uniquely inferred across CODE-MFA iterations in HeLa cells.

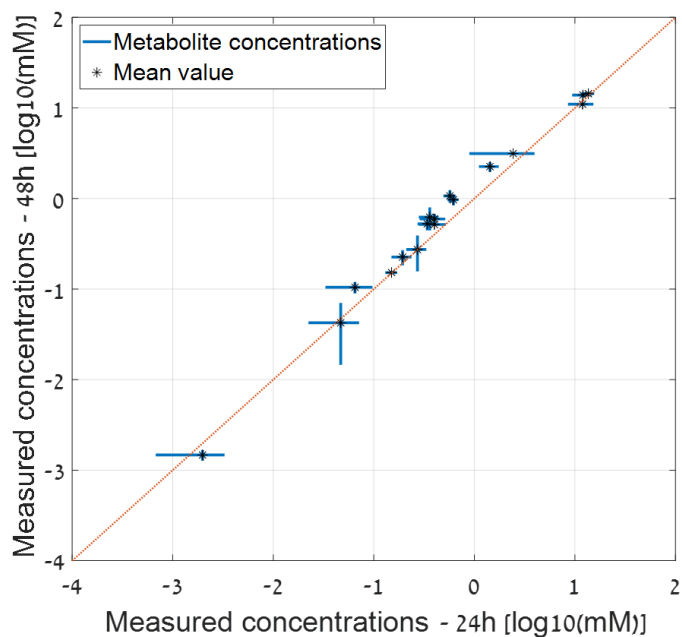

**Figure S2:** intracellular metabolite concentrations made after 24-hour vs. 48-hour incubation in HeLa cells (data are presented as mean values  $\pm$ SD, n=3 independent biological replicates).

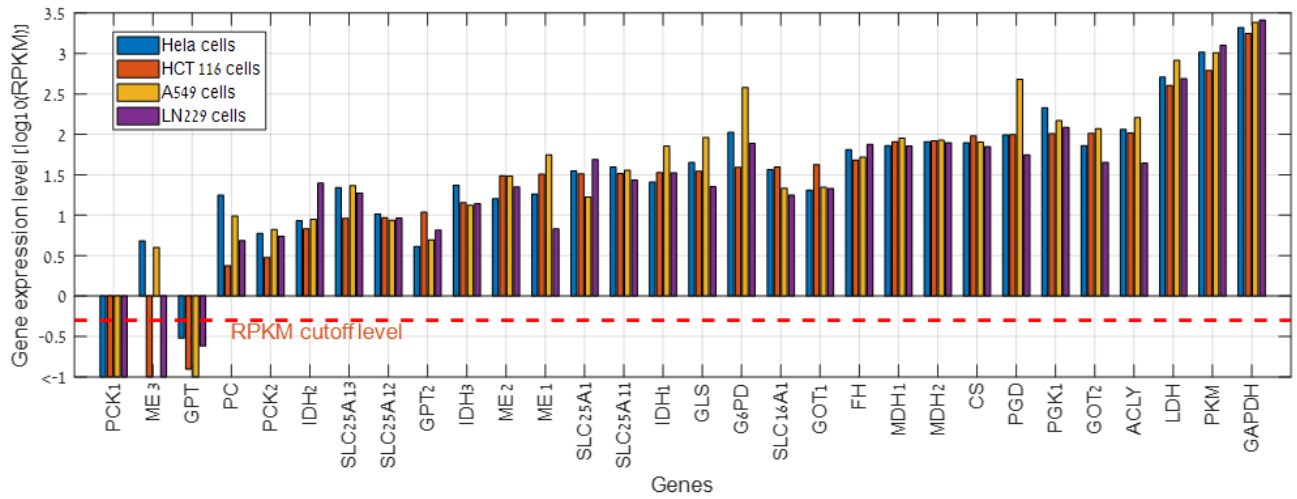

**Figure S3:** Gene expression levels obtained from the Broad Institute Cancer Cell Line Encyclopedia (CCLE), with 0.5 RPKM value as the cutoff to determine non-expressed genes.

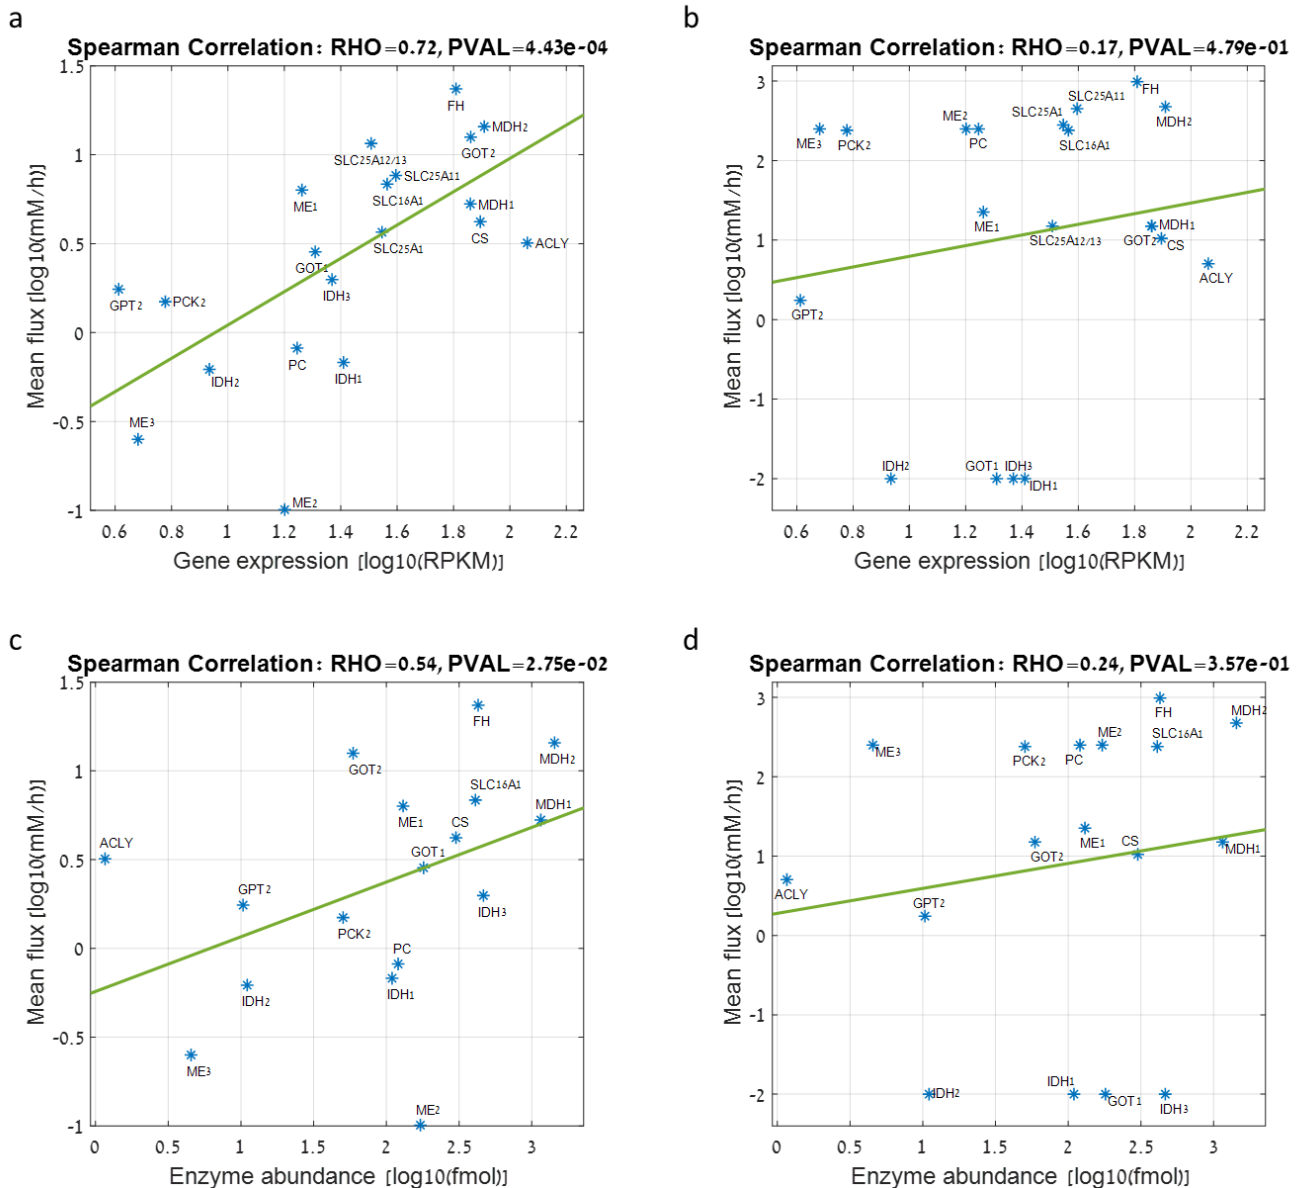

**Figure S4: Correlation between gene expression and enzyme abundance levels with most probable net flux inferred by CODE-MFA in HeLa cells.** (a) Gene expression levels and most probable net flux inferred by CODE-MFA through the corresponding enzyme. (b) Gene expression levels and most probable net flux inferred by MFA through the corresponding enzyme. (c) Measured enzyme abundance<sup>47</sup> and most probable net fluxes inferred by CODE-MFA (d) Measured enzyme abundance<sup>88</sup> and most probable net fluxes inferred by MFA

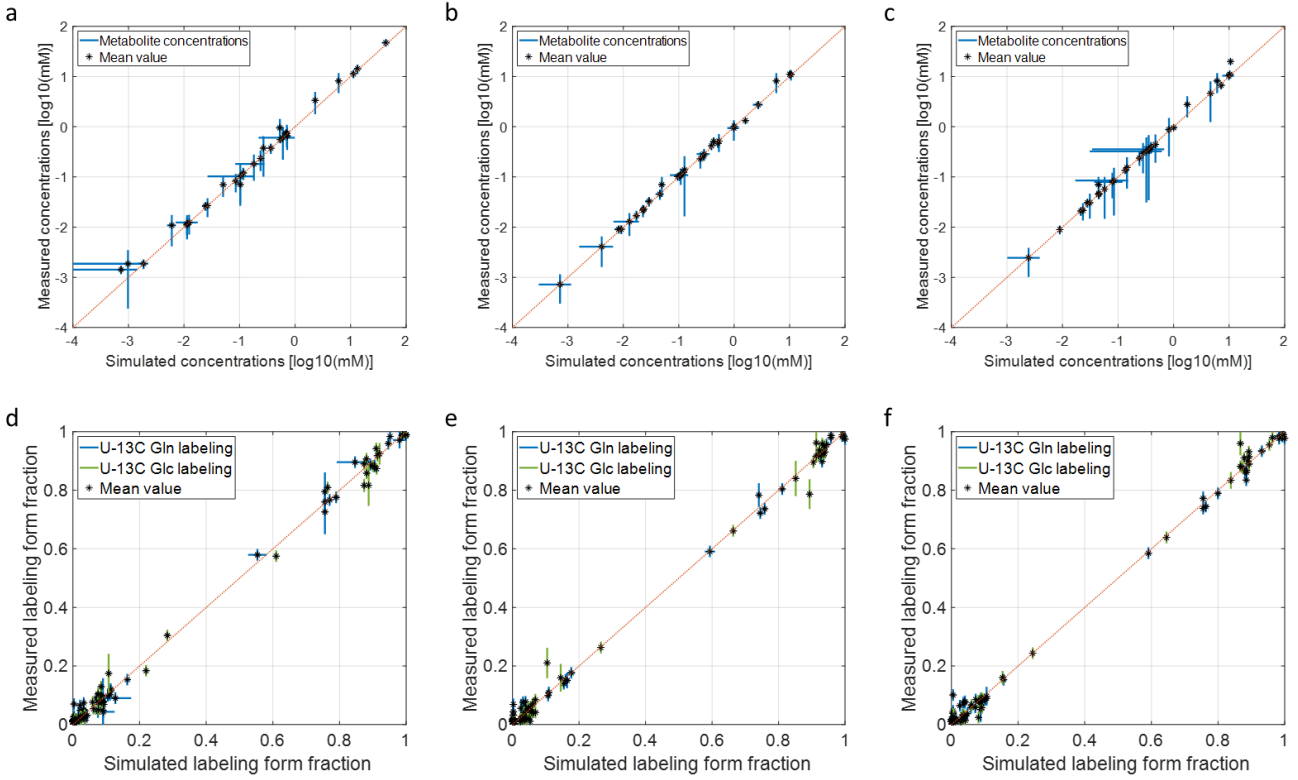

**Figure S5: The fit between compartmentalized CODE-MFA predictions and total cellular measurements.** (a-c) The fit between simulated total cellular metabolite concentration (i.e. convolution of simulated mitochondrial and cytosolic labeling; x-axis) and measurements (y-axis; data are presented as mean values  $\pm$ SD,  $n=3$  independent biological replicates) in HCT116 (a), A549 (b), and LN229 (c). (d-f) The fit between simulated total cellular metabolite isotopic labeling (x-axis) and experimental measurements (y-axis; data are presented as mean values  $\pm$ SD,  $n=3$  independent biological replicates) in HCT116 (d), A549 (e), and LN229 (f).

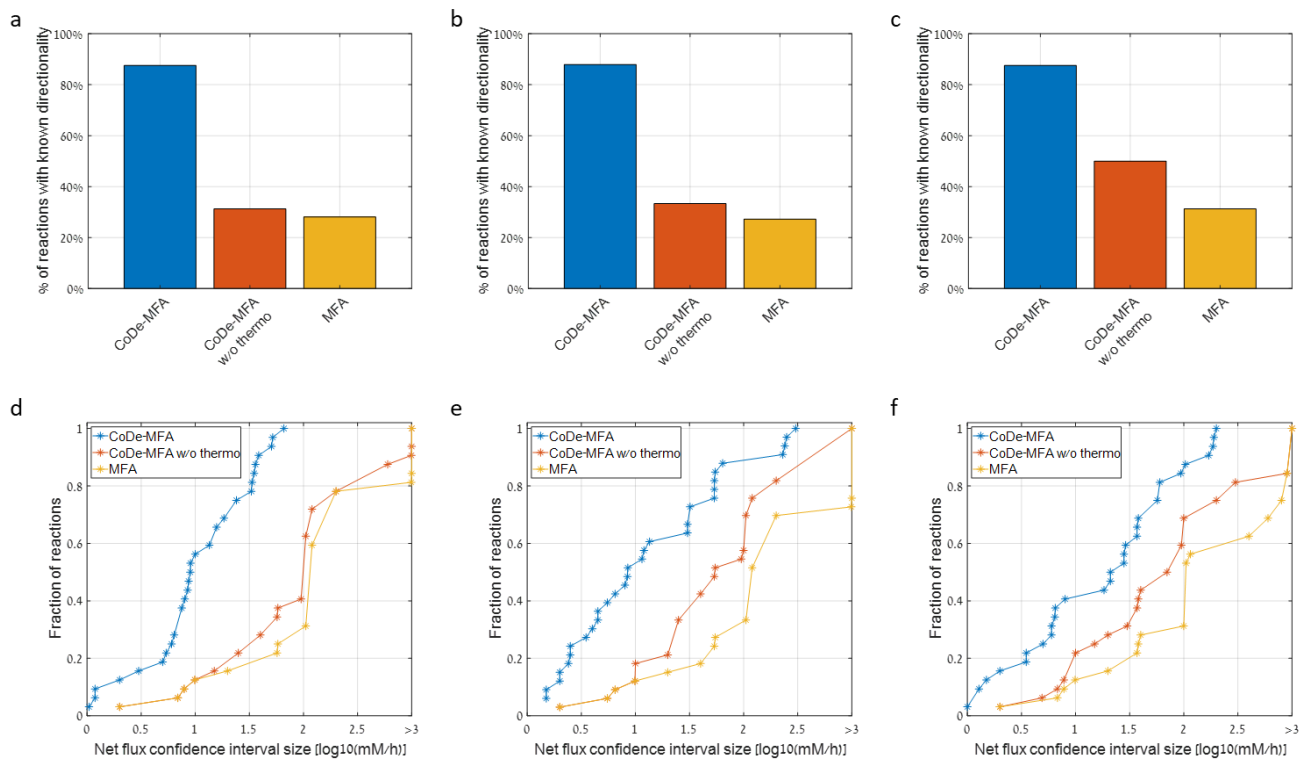

**Figure S6: CODE-MFA performance in inferring compartmentalized fluxes in HCT116, A549, and LN229.** (a,b,c) Percentage of reactions in the model whose direction of net flux is inferred by CODE-MFA versus with MFA and MFA without thermodynamics considerations in HCT116 (a), A549 (b), and LN229 (c). (d,e,f) Cumulative distribution of reaction net flux confidence interval sizes inferred by CODE-MFA versus MFA and CoDe-MFA without thermodynamic considerations in HCT116 (d), A549 (e), and LN229 (f).

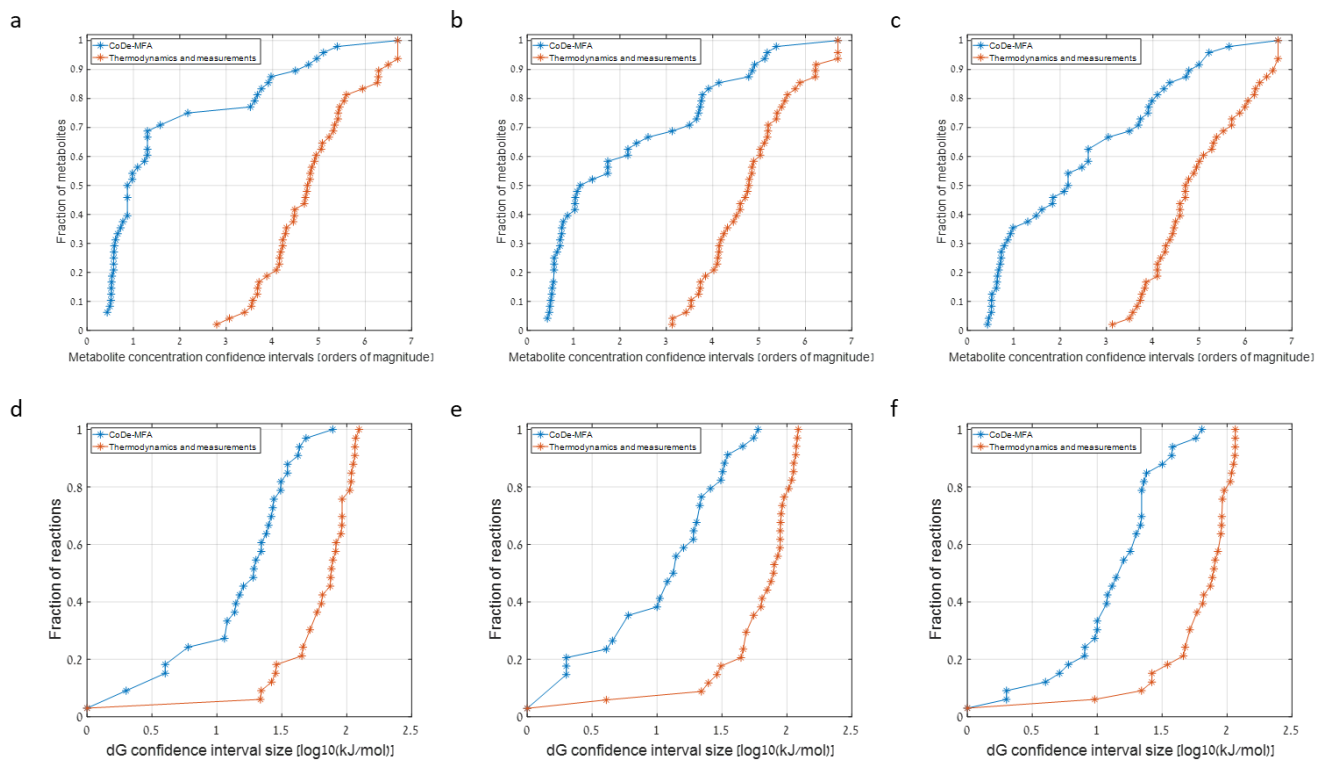

**Figure S7: CODE-MFA performance in inferring compartmentalized metabolite concentrations and Gibbs free energy in HCT116, A549, and LN229.** (a,b,c) Cumulative distribution of reaction metabolite concentration confidence interval sizes inferred by CODE-MFA versus with strictly thermodynamic analysis in HCT116 (a), A549 (b), and LN229 (c). (d,e,f) Cumulative distribution of reaction Gibbs energy confidence interval sizes inferred by CODE-MFA versus with strictly thermodynamic analysis in HCT116 (d), A549 (e), and LN229 (f).

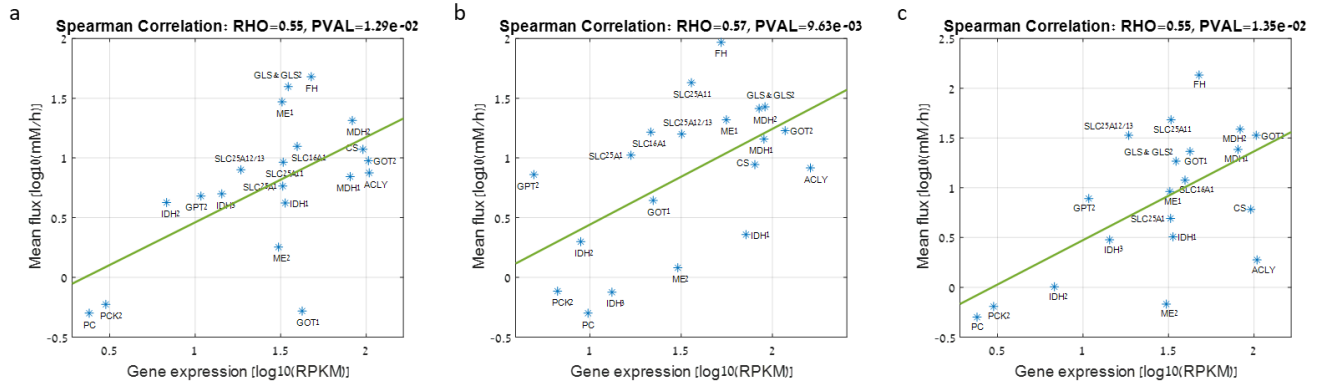

**Figure S8:** Correlation between CODE-MFA most probable net flux estimates and gene expression levels in HCT116 (a), A549 (b), and LN229 (c).



Supplementary Table 1. A compartmentalized network model of central metabolism used for CoDe-MFA - HeLa cells

| Reaction # | Reaction description                                                                | Reaction type    | Carbon mapping                 | Flux lower bound [mM/h] | Flux upper bound [mM/h] | Standard Gibbs free energy (kJ/mol) |
|------------|-------------------------------------------------------------------------------------|------------------|--------------------------------|-------------------------|-------------------------|-------------------------------------|
| v1         | Glutamine_Media => Glutamine_CY                                                     | Uptake/Secretion | abcde => abcde                 | 81                      | 82                      |                                     |
| v2         | Glutamate_CY => Glutamate_Media                                                     | Uptake/Secretion | abcde => abcde                 | 0                       | 70                      |                                     |
| v3         | Glucose_Media => Glc6P_CY                                                           | Uptake/Secretion | abcdef => abcdef               | 111                     | 355                     |                                     |
| v4         | Lactate_CY => Lactate_Media                                                         | Uptake/Secretion | abc => abc                     | 506                     | 643                     |                                     |
| v5         | Pyruvate_CY => Pyruvate_Media                                                       | Uptake/Secretion | abc => abc                     | 3.5                     | 4.8                     |                                     |
| v13        | Aspartate_CY => Fumarate_CY                                                         | Others           | abcd => abcd                   | 2                       | 4                       |                                     |
| v16        | R5P_CY => R5P_CY_Pool                                                               | Demand           | abcde => abcde                 | 2                       | 4                       |                                     |
| v17        | Acetyl_CoA_CY => Fatty_Acid                                                         | Demand           | ab => ab                       | 0                       | 10                      |                                     |
| v18        | CarAsp_CY => Pyrimidines                                                            | Demand           | abcde => abcde                 | 2                       | 4                       |                                     |
| v19        | Asparagine_CY => Asparagine_CY_Pool                                                 | Demand           | abcd => abcd                   | 1                       | 3                       |                                     |
| v21        | Proline_MT => Proline_MT_Pool                                                       | Demand           | abcde => abcde                 | 1                       | 3                       |                                     |
| v51        | Glutamine_CY <=> Glutamine_MT                                                       | Others           | abcde => abcde                 | -Inf                    | Inf                     |                                     |
| v52.1      | Glutamate_CY <=> Glutamate_MT                                                       | Others           | abcde => abcde                 | -Inf                    | Inf                     |                                     |
| v53.1      | AKG_CY + Malate_MT => AKG_MT + Malate_CY                                            | Others           | abcde + fghi => abcde + fghi   | -Inf                    | Inf                     | 0                                   |
| v53.2      | AKG_MT + Glutathione_CY => AKG_CY + Glutathione_MT                                  | Others           | abcde => abcde                 | -Inf                    | Inf                     | -14.4                               |
| v55        | Fumarate_MT <=> Fumarate_CY                                                         | Others           | abcd => abcd                   | -Inf                    | Inf                     |                                     |
| v56.1      | Malate_MT + Citrate_CY => Malate_CY + Citrate_MT                                    | Others           | abcd + efghij => abcd + efghij | -Inf                    | Inf                     | 14.5                                |
| v57        | Aspartate_MT + Glutamate_CY => Aspartate_CY + Glutamate_MT                          | Others           | abcd + efghi => abcd + efghi   | -Inf                    | Inf                     | -17.43                              |
| v58        | Alanine_MT => Alanine_CY                                                            | Others           | abc => abc                     | -Inf                    | Inf                     | 0.07                                |
| v59        | Pyruvate_MT => Pyruvate_CY                                                          | Others           | abc => abc                     | -Inf                    | Inf                     | 2.9                                 |
| v60        | PEP_CY + Citrate_MT => PEP_MT + Citrate_CY                                          | Others           | abc + defghi => abc + defghi   | -Inf                    | Inf                     | -0.04                               |
| v101       | Glutamine_CY => Glutamine_CY_Pool                                                   | Demand           | abcde => abcde                 | 1                       | 3                       |                                     |
| v102       | Glutamine_CY <=> Glutamate_CY                                                       | Others           | abcde => abcde                 | -Inf                    | Inf                     |                                     |
| v105       | Glutamate_CY => Glutamate_CY_Pool                                                   | Demand           | abcde => abcde                 | 1                       | 3                       |                                     |
| v106.1     | Glutamate_CY <=> AKG_CY                                                             | Others           | abcde => abcde                 | -Inf                    | Inf                     |                                     |
| v107       | Citrate_CY + NADP_CY => AKG_CY + NADPH_CY + CO2                                     | Others           | abcdef => abcde + f            | -Inf                    | Inf                     | -3.1                                |
| v108       | Citrate_CY + ATP_CY + CoA_CY => Acetyl_CoA_CY + OAA_CY + ADP_CY + Orthophosphate_CY | Others           | abcdef => ed + fcba            | -Inf                    | Inf                     | -8.9                                |
| v109       | Fumarate_CY => Malate_CY                                                            | Others           | abcd => abcd or dcba           | -Inf                    | Inf                     | -3.5                                |
| v111       | Malate_CY + NAD_CY => OAA_CY + NADH_CY                                              | Others           | abcd => abcd                   | -Inf                    | Inf                     | 30.3                                |
| v112       | Malate_CY + NADP_CY => Pyruvate_CY + CO2 + NADPH_CY                                 | Others           | abcd => abc + d                | -Inf                    | Inf                     | -3.1                                |
| v113       | OAA_CY + Glutamate_CY => Aspartate_CY + AKG_CY                                      | Others           | abcd + efghi => abcd + efghi   | -Inf                    | Inf                     | -2.9                                |
| v114       | Aspartate_CY + CO2 => CarAsp_CY                                                     | Others           | abcd + e => abcde              | 0                       | Inf                     |                                     |
| v115       | Aspartate_CY => Asparagine_CY                                                       | Others           | abcd => abcd                   | 0                       | Inf                     |                                     |
| v116       | Aspartate_CY => Aspartate_CY_Pool                                                   | Demand           | abcd => abcd                   | 1                       | 3                       |                                     |
| v117       | Alanine_CY => Alanine_CY_Pool                                                       | Demand           | abc => abc                     | 1                       | 3                       |                                     |
| v118       | Pyruvate_CY + NADH_CY => Lactate_CY + NAD_CY                                        | Others           | abc => abc                     | 0                       | Inf                     | -27.5                               |
| v119       | PEP_CY + ADP_CY => Pyruvate_CY + ATP_CY                                             | Others           | abc => abc                     | 0                       | Inf                     | -27.7                               |
| v120       | 3PG_CY => PEP_CY                                                                    | Others           | abc => abc                     | 0                       | Inf                     |                                     |
| v121       | 13BPG_CY + ADP_CY => 3PG_CY + ATP_CY                                                | Others           | abc => abc                     | 0                       | Inf                     | -18.5                               |
| v122       | G3P_CY + NAD_CY + Orthophosphate_CY => 13BPG_CY + NADH_CY                           | Others           | abc => abc                     | 0                       | Inf                     | 24.9                                |
| v123       | Glc6P_CY => G3P_CY + G3P_CY                                                         | Others           | abcdef => abc + fed            | 0                       | Inf                     |                                     |
| v124       | Glc6P_CY + NADP_CY => 6phosphogluconate_CY + NADPH_CY                               | Others           | abcdef => abcdef               | 0                       | Inf                     | -23.2                               |
| v125       | 6phosphogluconate_CY + NADP_CY => R5P_CY + NADPH_CY + CO2                           | Others           | abcdef => abcde + f            | -Inf                    | Inf                     | -7.8                                |
| v201       | Glutamine_MT => Glutamine_MT_Pool                                                   | Demand           | abcde => abcde                 | 1                       | 3                       |                                     |
| v202       | Glutamine_MT => Glutamate_MT + NH3                                                  | Others           | abcde => abcde                 | -Inf                    | Inf                     | -28.6                               |
| v203       | Glutamate_MT => Proline_MT                                                          | Others           | abcde => abcde                 | 0                       | Inf                     |                                     |
| v204       | Glutamate_MT => Glutamate_MT_Pool                                                   | Demand           | abcde => abcde                 | 1                       | 3                       |                                     |
| v205.1     | Glutamate_MT <=> AKG_MT                                                             | Others           | abcde => abcde                 | -Inf                    | Inf                     |                                     |
| v206       | AKG_MT + CO2 + NADPH_MT => Citrate_MT + NADP_MT                                     | Others           | abcde + f => abcdef            | -Inf                    | Inf                     | 3.1                                 |
| v207       | AKG_MT + CO2 + NADH_MT => Citrate_MT + NAD_MT                                       | Others           | abcde + f => abcdef            | -Inf                    | Inf                     | 4.1                                 |
| v208       | Acetyl_CoA_MT + OAA_MT => Citrate_MT + CoA_MT                                       | Others           | ab + cdef => fedbac            | -Inf                    | Inf                     | -37.5                               |
| v209       | AKG_MT => CO2 + Fumarate_MT                                                         | Others           | abcde => abcd + e              | 0                       | Inf                     |                                     |
| v210       | Fumarate_MT => Malate_MT                                                            | Others           | abcd => abcd or dcba           | -Inf                    | Inf                     | -3.4                                |
| v212       | Malate_MT + NAD_MT => OAA_MT + NADH_MT                                              | Others           | abcd => abcd                   | -Inf                    | Inf                     | 27.5                                |
| v213.1     | Malate_MT + NAD_MT => Pyruvate_MT + CO2 + NADH_MT                                   | Others           | abcd => abc + d                | -Inf                    | Inf                     | -4.1                                |
| v213.2     | Malate_MT + NADP_MT => Pyruvate_MT + CO2 + NADPH_MT                                 | Others           | abcd => abc + d                | -Inf                    | Inf                     | -3.1                                |
| v214       | Aspartate_MT + AKG_MT => OAA_MT + Glutamate_MT                                      | Others           | abcd + efghi => abcd + efghi   | -Inf                    | Inf                     | 2.9                                 |
| v215       | Aspartate_MT => Aspartate_MT_Pool                                                   | Demand           | abcd => abcd                   | 1                       | 3                       |                                     |
| v216       | Alanine_MT => Alanine_MT_Pool                                                       | Demand           | abc => abc                     | 1                       | 3                       |                                     |
| v217       | Pyruvate_MT + Glutamate_MT => Alanine_MT + AKG_MT                                   | Others           | abc + defgh => abc + defgh     | -Inf                    | Inf                     | -0.4                                |
| v218       | PEP_MT + CO2 + GDP_MT => OAA_MT + GTP_MT                                            | Others           | abc + d => abcd                | -Inf                    | Inf                     | 4                                   |
| v219       | Pyruvate_MT + NAD_MT + CoA_MT => CO2 + Acetyl_CoA_MT + NADH_MT                      | Others           | abc => a + bc                  | 0                       | Inf                     | -35.3                               |
| v220       | Pyruvate_MT + CO2 + ATP_MT => OAA_MT + Orthophosphate_MT + ADP_MT                   | Others           | abc + d => abcd                | 0                       | Inf                     | -6.4                                |

**Supplementary Table 2. The fractional labeling of metabolites when feeding HeLa cells with [U-13C]-glucose and [U-13C]-glutamine for 24 h.**

| Metabolite        | Mass-isotopomer | Glutamine<br>(measured mean -<br>after natural<br>abundance and<br>impurity correction) | Glutamine<br>(measured SD) | Glutamine<br>(simulated best<br>match) | Glucose<br>(measured mean -<br>after natural<br>abundance and<br>impurity correction) | Glucose<br>(measured SD) | Glucose<br>(simulated best<br>match) | Lactate<br>(measured mean -<br>after natural<br>abundance and<br>impurity correction) | Lactate<br>(measured SD) |
|-------------------|-----------------|-----------------------------------------------------------------------------------------|----------------------------|----------------------------------------|---------------------------------------------------------------------------------------|--------------------------|--------------------------------------|---------------------------------------------------------------------------------------|--------------------------|
| 6phosphogluconate | M+0             | 1                                                                                       | 0                          | 1                                      | 0.07                                                                                  | 0.038                    | 0                                    |                                                                                       |                          |
| 6phosphogluconate | M+1             | 0                                                                                       | 0                          | 0                                      | 0                                                                                     | 0.002                    | 0                                    |                                                                                       |                          |
| 6phosphogluconate | M+2             | 0                                                                                       | 0                          | 0                                      | 0                                                                                     | 0                        | 0                                    |                                                                                       |                          |
| 6phosphogluconate | M+3             | 0                                                                                       | 0                          | 0                                      | 0                                                                                     | 0                        | 0                                    |                                                                                       |                          |
| 6phosphogluconate | M+4             | 0                                                                                       | 0                          | 0                                      | 0                                                                                     | 0.001                    | 0                                    |                                                                                       |                          |
| 6phosphogluconate | M+5             | 0                                                                                       | 0                          | 0                                      | 0.05                                                                                  | 0.003                    | 0.05                                 |                                                                                       |                          |
| 6phosphogluconate | M+6             | 0                                                                                       | 0                          | 0                                      | 0.89                                                                                  | 0.04                     | 0.95                                 |                                                                                       |                          |
| R5P               | M+0             | 1                                                                                       | 0.008                      | 1                                      | 0                                                                                     | 0.004                    | 0                                    |                                                                                       |                          |
| R5P               | M+1             | 0                                                                                       | 0.008                      | 0                                      | 0                                                                                     | 0                        | 0                                    |                                                                                       |                          |
| R5P               | M+2             | 0                                                                                       | 0                          | 0                                      | 0.01                                                                                  | 0.002                    | 0                                    |                                                                                       |                          |
| R5P               | M+3             | 0                                                                                       | 0                          | 0                                      | 0.01                                                                                  | 0.002                    | 0                                    |                                                                                       |                          |
| R5P               | M+4             | 0                                                                                       | 0                          | 0                                      | 0                                                                                     | 0.002                    | 0                                    |                                                                                       |                          |
| R5P               | M+5             | 0                                                                                       | 0                          | 0                                      | 0.98                                                                                  | 0.01                     | 1                                    |                                                                                       |                          |
| Lactate           | M+0             | 0.99                                                                                    | 0.001                      | 0.99                                   | 0.04                                                                                  | 0.002                    | 0.01                                 | 0.965                                                                                 | 0.003                    |
| Lactate           | M+1             | 0                                                                                       | 0.001                      | 0                                      | 0                                                                                     | 0                        | 0                                    | 0.01                                                                                  | 0                        |
| Lactate           | M+2             | 0                                                                                       | 0                          | 0                                      | 0                                                                                     | 0.002                    | 0                                    | 0                                                                                     | 0                        |
| Lactate           | M+3             | 0.01                                                                                    | 0                          | 0.01                                   | 0.96                                                                                  | 0.001                    | 0.99                                 | 0.025                                                                                 | 0.004                    |
| PEP               | M+0             | 1                                                                                       | 0.003                      | 0.99                                   | 0.02                                                                                  | 0.009                    | 0.01                                 |                                                                                       |                          |
| PEP               | M+1             | 0                                                                                       | 0.003                      | 0                                      | 0                                                                                     | 0                        | 0                                    |                                                                                       |                          |
| PEP               | M+2             | 0                                                                                       | 0                          | 0                                      | 0                                                                                     | 0                        | 0                                    |                                                                                       |                          |
| PEP               | M+3             | 0                                                                                       | 0                          | 0.01                                   | 0.98                                                                                  | 0.009                    | 0.99                                 |                                                                                       |                          |
| Pyruvate          | M+0             | 0.99                                                                                    | 0.004                      | 0.99                                   | 0.02                                                                                  | 0.003                    | 0.01                                 | 0.975                                                                                 | 0.001                    |
| Pyruvate          | M+1             | 0                                                                                       | 0.002                      | 0                                      | 0                                                                                     | 0                        | 0                                    | 0.015                                                                                 | 0.001                    |
| Pyruvate          | M+2             | 0                                                                                       | 0                          | 0                                      | 0                                                                                     | 0.002                    | 0                                    | 0                                                                                     | 0                        |
| Pyruvate          | M+3             | 0.01                                                                                    | 0.005                      | 0.01                                   | 0.98                                                                                  | 0.002                    | 0.99                                 | 0.01                                                                                  | 0.001                    |
| Alanine           | M+0             | 0.99                                                                                    | 0.001                      | 0.99                                   | 0.13                                                                                  | 0.008                    | 0.13                                 |                                                                                       |                          |
| Alanine           | M+1             | 0                                                                                       | 0.001                      | 0                                      | 0                                                                                     | 0                        | 0                                    |                                                                                       |                          |
| Alanine           | M+2             | 0                                                                                       | 0                          | 0                                      | 0                                                                                     | 0.003                    | 0                                    |                                                                                       |                          |
| Alanine           | M+3             | 0.01                                                                                    | 0.001                      | 0.01                                   | 0.87                                                                                  | 0.009                    | 0.87                                 |                                                                                       |                          |
| Citrate           | M+0             | 0.12                                                                                    | 0.043                      | 0.12                                   | 0.2                                                                                   | 0.043                    | 0.2                                  |                                                                                       |                          |
| Citrate           | M+1             | 0                                                                                       | 0.003                      | 0                                      | 0.01                                                                                  | 0.002                    | 0                                    |                                                                                       |                          |
| Citrate           | M+2             | 0.03                                                                                    | 0.003                      | 0.02                                   | 0.64                                                                                  | 0.032                    | 0.67                                 |                                                                                       |                          |
| Citrate           | M+3             | 0.12                                                                                    | 0.006                      | 0.12                                   | 0.03                                                                                  | 0.004                    | 0.01                                 |                                                                                       |                          |
| Citrate           | M+4             | 0.58                                                                                    | 0.029                      | 0.58                                   | 0.02                                                                                  | 0.001                    | 0.02                                 |                                                                                       |                          |
| Citrate           | M+5             | 0.15                                                                                    | 0.008                      | 0.15                                   | 0.1                                                                                   | 0.007                    | 0.1                                  |                                                                                       |                          |
| Citrate           | M+6             | 0.01                                                                                    | 0.002                      | 0.01                                   | 0                                                                                     | 0                        | 0                                    |                                                                                       |                          |
| AKG               | M+0             | 0.03                                                                                    | 0                          | 0                                      | 0.99                                                                                  | 0.003                    | 0.97                                 |                                                                                       |                          |
| AKG               | M+1             | 0                                                                                       | 0                          | 0                                      | 0                                                                                     | 0.001                    | 0                                    |                                                                                       |                          |
| AKG               | M+2             | 0                                                                                       | 0.013                      | 0                                      | 0.01                                                                                  | 0.003                    | 0.02                                 |                                                                                       |                          |
| AKG               | M+3             | 0.01                                                                                    | 0.003                      | 0.02                                   | 0                                                                                     | 0                        | 0                                    |                                                                                       |                          |
| AKG               | M+4             | 0                                                                                       | 0.004                      | 0                                      | 0                                                                                     | 0                        | 0                                    |                                                                                       |                          |
| AKG               | M+5             | 0.95                                                                                    | 0.012                      | 0.97                                   | 0                                                                                     | 0.001                    | 0                                    |                                                                                       |                          |
| Glutamine         | M+0             | 0.01                                                                                    | 0.001                      | 0                                      | 1                                                                                     | 0                        | 1                                    |                                                                                       |                          |
| Glutamine         | M+1             | 0                                                                                       | 0                          | 0                                      | 0                                                                                     | 0                        | 0                                    |                                                                                       |                          |
| Glutamine         | M+2             | 0                                                                                       | 0                          | 0                                      | 0                                                                                     | 0                        | 0                                    |                                                                                       |                          |
| Glutamine         | M+3             | 0                                                                                       | 0                          | 0                                      | 0                                                                                     | 0                        | 0                                    |                                                                                       |                          |
| Glutamine         | M+4             | 0                                                                                       | 0                          | 0                                      | 0                                                                                     | 0                        | 0                                    |                                                                                       |                          |
| Glutamine         | M+5             | 0.99                                                                                    | 0.001                      | 1                                      | 0                                                                                     | 0                        | 0                                    |                                                                                       |                          |
| Glutamate media   | M+0             | 0.03                                                                                    | 0.002                      | 0                                      | 0.98                                                                                  | 0                        | 0.97                                 |                                                                                       |                          |

|                 |      |      |       |      |      |       |      |
|-----------------|------|------|-------|------|------|-------|------|
| Glutamate media | M+1  | 0    | 0     | 0    | 0    | 0     | 0    |
| Glutamate media | M+2  | 0    | 0     | 0    | 0.02 | 0.001 | 0.02 |
| Glutamate media | M+3  | 0.02 | 0     | 0.02 | 0    | 0     | 0    |
| Glutamate media | M+4  | 0    | 0     | 0    | 0    | 0     | 0    |
| Glutamate media | M+5  | 0.95 | 0.002 | 0.97 | 0    | 0     | 0    |
| Glutamate       | M+0  | 0.03 | 0.002 | 0    | 0.98 | 0.001 | 0.98 |
| Glutamate       | M+1  | 0    | 0     | 0    | 0    | 0.001 | 0    |
| Glutamate       | M+2  | 0    | 0     | 0    | 0.01 | 0     | 0.02 |
| Glutamate       | M+3  | 0.01 | 0     | 0.01 | 0    | 0     | 0    |
| Glutamate       | M+4  | 0    | 0.001 | 0    | 0    | 0     | 0    |
| Glutamate       | M+5  | 0.96 | 0.002 | 0.98 | 0    | 0     | 0    |
| Fumarate        | M+0  | 0.16 | 0.032 | 0.12 | 0.87 | 0.02  | 0.87 |
| Fumarate        | M+1  | 0.01 | 0.01  | 0    | 0.01 | 0.009 | 0    |
| Fumarate        | M+2  | 0.01 | 0.001 | 0.02 | 0    | 0.005 | 0.02 |
| Fumarate        | M+3  | 0.14 | 0.008 | 0.15 | 0.11 | 0.012 | 0.11 |
| Fumarate        | M+4  | 0.68 | 0.016 | 0.71 | 0    | 0.001 | 0    |
| Asparagine      | M+0  | 0.15 | 0.006 | 0.13 | 0.86 | 0.01  | 0.85 |
| Asparagine      | M+1  | 0.02 | 0.008 | 0    | 0.01 | 0.002 | 0    |
| Asparagine      | M+2  | 0    | 0     | 0.02 | 0.02 | 0.001 | 0.02 |
| Asparagine      | M+3  | 0.14 | 0.003 | 0.18 | 0.12 | 0.01  | 0.12 |
| Asparagine      | M+4  | 0.69 | 0.004 | 0.66 | 0    | 0     | 0    |
| Aspartate       | M+0  | 0.14 | 0     | 0.13 | 0.86 | 0.003 | 0.85 |
| Aspartate       | M+1  | 0    | 0.001 | 0    | 0    | 0.001 | 0    |
| Aspartate       | M+2  | 0.03 | 0.001 | 0.02 | 0.02 | 0     | 0.02 |
| Aspartate       | M+3  | 0.21 | 0.002 | 0.18 | 0.11 | 0.002 | 0.12 |
| Aspartate       | M+4  | 0.62 | 0.003 | 0.67 | 0    | 0     | 0    |
| CarAsp          | M+0  | 0.13 | 0.01  | 0.13 | 0.88 | 0.017 | 0.85 |
| CarAsp          | M+1  | 0    | 0.003 | 0    | 0    | 0.008 | 0    |
| CarAsp          | M+2  | 0.01 | 0.004 | 0.02 | 0    | 0     | 0.02 |
| CarAsp          | M+3  | 0.17 | 0.012 | 0.18 | 0.11 | 0.009 | 0.12 |
| CarAsp          | M+4  | 0.69 | 0.02  | 0.66 | 0    | 0     | 0    |
| CarAsp          | M+5  | 0    | 0.001 | 0    | 0    | 0     | 0    |
| Malate          | M+0  | 0.12 | 0.003 | 0.11 | 0.89 | 0.009 | 0.88 |
| Malate          | M+1  | 0    | 0.001 | 0    | 0    | 0.001 | 0    |
| Malate          | M+2  | 0.02 | 0.002 | 0.02 | 0.02 | 0.001 | 0.02 |
| Malate          | M+3  | 0.18 | 0.001 | 0.19 | 0.09 | 0.009 | 0.1  |
| Malate          | M+4  | 0.67 | 0.004 | 0.68 | 0    | 0     | 0    |
| Palmitic acid   | M+0  | 0.63 | 0.018 |      | 0.59 | 0.01  |      |
| Palmitic acid   | M+1  | 0.02 | 0.006 |      | 0.02 | 0.007 |      |
| Palmitic acid   | M+2  | 0.08 | 0.004 |      | 0.03 | 0.002 |      |
| Palmitic acid   | M+3  | 0    | 0.002 |      | 0    | 0.001 |      |
| Palmitic acid   | M+4  | 0.08 | 0.009 |      | 0.03 | 0.002 |      |
| Palmitic acid   | M+5  | 0    | 0.002 |      | 0    | 0     |      |
| Palmitic acid   | M+6  | 0.07 | 0.008 |      | 0.04 | 0.003 |      |
| Palmitic acid   | M+7  | 0    | 0     |      | 0    | 0     |      |
| Palmitic acid   | M+8  | 0.05 | 0.001 |      | 0.05 | 0.004 |      |
| Palmitic acid   | M+9  | 0    | 0.001 |      | 0    | 0.001 |      |
| Palmitic acid   | M+10 | 0.04 | 0.003 |      | 0.08 | 0.001 |      |
| Palmitic acid   | M+11 | 0    | 0.002 |      | 0    | 0.002 |      |
| Palmitic acid   | M+12 | 0.02 | 0.001 |      | 0.08 | 0.004 |      |
| Palmitic acid   | M+13 | 0    | 0     |      | 0    | 0.001 |      |
| Palmitic acid   | M+14 | 0.01 | 0.001 |      | 0.06 | 0.002 |      |
| Palmitic acid   | M+15 | 0    | 0     |      | 0    | 0.001 |      |
| Palmitic acid   | M+16 | 0    | 0     |      | 0.02 | 0.002 |      |
| Acetyl-CoA      | M+0  | 0.61 | 0.011 |      | 0.01 | 0.017 |      |

|            |      |      |       |      |       |
|------------|------|------|-------|------|-------|
| Acetyl-CoA | M+1  | 0.05 | 0.002 | 0    | 0.003 |
| Acetyl-CoA | M+2  | 0.32 | 0.003 | 0.03 | 0.001 |
| Acetyl-CoA | M+3  | 0.02 | 0.006 | 0    | 0.004 |
| Acetyl-CoA | M+4  | 0    | 0.01  | 0.01 | 0.004 |
| Acetyl-CoA | M+5  | 0    | 0     | 0.36 | 0.005 |
| Acetyl-CoA | M+6  | 0    | 0     | 0.06 | 0     |
| Acetyl-CoA | M+7  | 0    | 0     | 0.43 | 0.021 |
| Acetyl-CoA | M+8  | 0    | 0     | 0.06 | 0.01  |
| Acetyl-CoA | M+9  | 0    | 0     | 0    | 0     |
| Acetyl-CoA | M+10 | 0    | 0     | 0    | 0     |
| Acetyl-CoA | M+11 | 0    | 0     | 0    | 0     |
| Acetyl-CoA | M+12 | 0    | 0     | 0    | 0     |
| Acetyl-CoA | M+13 | 0    | 0     | 0    | 0     |
| Acetyl-CoA | M+14 | 0    | 0     | 0    | 0     |
| Acetyl-CoA | M+15 | 0    | 0     | 0    | 0     |
| Acetyl-CoA | M+16 | 0    | 0     | 0    | 0     |
| Acetyl-CoA | M+17 | 0    | 0     | 0    | 0     |
| Acetyl-CoA | M+18 | 0    | 0     | 0    | 0     |
| Acetyl-CoA | M+19 | 0    | 0     | 0    | 0     |
| Acetyl-CoA | M+20 | 0    | 0     | 0    | 0     |
| Acetyl-CoA | M+21 | 0    | 0     | 0    | 0     |
| Acetyl-CoA | M+22 | 0    | 0     | 0    | 0     |
| Acetyl-CoA | M+23 | 0    | 0     | 0    | 0     |
| CoA        | M+0  | 0.86 | 0.028 | 0.07 | 0.006 |
| CoA        | M+1  | 0.06 | 0.011 | 0.01 | 0.006 |
| CoA        | M+2  | 0.07 | 0.006 | 0.01 | 0.002 |
| CoA        | M+3  | 0    | 0.005 | 0    | 0.004 |
| CoA        | M+4  | 0    | 0.001 | 0    | 0     |
| CoA        | M+5  | 0.01 | 0.018 | 0.74 | 0.003 |
| CoA        | M+6  | 0    | 0.007 | 0.11 | 0.018 |
| CoA        | M+7  | 0    | 0     | 0.06 | 0.005 |
| CoA        | M+8  | 0    | 0     | 0    | 0.011 |
| CoA        | M+9  | 0    | 0     | 0    | 0.011 |
| CoA        | M+10 | 0    | 0     | 0    | 0     |
| CoA        | M+11 | 0    | 0     | 0    | 0     |
| CoA        | M+12 | 0    | 0     | 0    | 0     |
| CoA        | M+13 | 0    | 0     | 0    | 0     |
| CoA        | M+14 | 0    | 0     | 0    | 0     |
| CoA        | M+15 | 0    | 0     | 0    | 0     |
| CoA        | M+16 | 0    | 0     | 0    | 0     |
| CoA        | M+17 | 0    | 0     | 0    | 0     |
| CoA        | M+18 | 0    | 0     | 0    | 0     |
| CoA        | M+19 | 0    | 0     | 0    | 0     |
| CoA        | M+20 | 0    | 0     | 0    | 0     |
| CoA        | M+21 | 0    | 0     | 0    | 0     |

**Supplementary Table 3. The fractional labeling of metabolites when feeding HCT116 cells with [U-13C]-glucose and [U-13C]-glutamine for 24 h.**

| Metabolite        | Mass-isotopomer | Glutamine<br>(measured mean -<br>after natural<br>abundance and<br>impurity correction) | Glutamine<br>(measured SD) | Glutamine<br>(simulated best<br>match) | Glucose<br>(measured mean - after<br>natural abundance and<br>impurity correction) | Glucose<br>(measured SD) | Glucose<br>(simulated best match) | Lactate<br>(measured mean - after<br>natural abundance and<br>impurity correction) | Lactate<br>(measured SD) |
|-------------------|-----------------|-----------------------------------------------------------------------------------------|----------------------------|----------------------------------------|------------------------------------------------------------------------------------|--------------------------|-----------------------------------|------------------------------------------------------------------------------------|--------------------------|
| 6phosphogluconate | M+0             | 1                                                                                       | 0.004                      | 1                                      | 0.05                                                                               | 0.007                    | 0.06                              |                                                                                    |                          |
| 6phosphogluconate | M+1             | 0                                                                                       | 0.004                      | 0                                      | 0                                                                                  | 0                        | 0                                 |                                                                                    |                          |
| 6phosphogluconate | M+2             | 0                                                                                       | 0                          | 0                                      | 0                                                                                  | 0                        | 0                                 |                                                                                    |                          |
| 6phosphogluconate | M+3             | 0                                                                                       | 0                          | 0                                      | 0                                                                                  | 0                        | 0                                 |                                                                                    |                          |
| 6phosphogluconate | M+4             | 0                                                                                       | 0                          | 0                                      | 0                                                                                  | 0                        | 0                                 |                                                                                    |                          |
| 6phosphogluconate | M+5             | 0                                                                                       | 0                          | 0                                      | 0.03                                                                               | 0.004                    | 0.02                              |                                                                                    |                          |
| 6phosphogluconate | M+6             | 0                                                                                       | 0                          | 0                                      | 0.92                                                                               | 0.003                    | 0.91                              |                                                                                    |                          |
| Lactate           | M+0             | 0.99                                                                                    | 0.003                      | 0.95                                   | 0.12                                                                               | 0.007                    | 0.1                               | 0.98                                                                               | 0.002                    |
| Lactate           | M+1             | 0                                                                                       | 0.001                      | 0                                      | 0                                                                                  | 0                        | 0                                 | 0.01                                                                               | 0                        |
| Lactate           | M+2             | 0                                                                                       | 0                          | 0.01                                   | 0                                                                                  | 0                        | 0                                 | 0                                                                                  | 0                        |
| Lactate           | M+3             | 0.01                                                                                    | 0.002                      | 0.04                                   | 0.88                                                                               | 0.007                    | 0.89                              | 0.01                                                                               | 0.001                    |
| PEP               | M+0             | 0.98                                                                                    | 0.017                      | 0.98                                   | 0.08                                                                               | 0.018                    | 0.08                              |                                                                                    |                          |
| PEP               | M+1             | 0                                                                                       | 0.002                      | 0                                      | 0                                                                                  | 0                        | 0                                 |                                                                                    |                          |
| PEP               | M+2             | 0                                                                                       | 0                          | 0                                      | 0                                                                                  | 0                        | 0                                 |                                                                                    |                          |
| PEP               | M+3             | 0.02                                                                                    | 0.019                      | 0.02                                   | 0.92                                                                               | 0.018                    | 0.92                              |                                                                                    |                          |
| Pyruvate          | M+0             | 0.96                                                                                    | 0.006                      | 0.95                                   | 0.17                                                                               | 0.034                    | 0.1                               | 0.97                                                                               | 0.006                    |
| Pyruvate          | M+1             | 0.01                                                                                    | 0.002                      | 0                                      | 0                                                                                  | 0.002                    | 0                                 | 0.02                                                                               | 0.005                    |
| Pyruvate          | M+2             | 0                                                                                       | 0.003                      | 0.01                                   | 0.01                                                                               | 0.001                    | 0                                 | 0                                                                                  | 0                        |
| Pyruvate          | M+3             | 0.03                                                                                    | 0.002                      | 0.04                                   | 0.82                                                                               | 0.035                    | 0.89                              | 0.01                                                                               | 0.001                    |
| Alanine           | M+0             | 0.9                                                                                     | 0.001                      | 0.9                                    | 0.18                                                                               | 0.007                    | 0.18                              |                                                                                    |                          |
| Alanine           | M+1             | 0                                                                                       | 0                          | 0.01                                   | 0                                                                                  | 0                        | 0                                 |                                                                                    |                          |
| Alanine           | M+2             | 0.01                                                                                    | 0                          | 0.01                                   | 0                                                                                  | 0.001                    | 0.01                              |                                                                                    |                          |
| Alanine           | M+3             | 0.09                                                                                    | 0.001                      | 0.08                                   | 0.81                                                                               | 0.006                    | 0.81                              |                                                                                    |                          |
| Citrate           | M+0             | 0.02                                                                                    | 0.017                      | 0.02                                   | 0.25                                                                               | 0.007                    | 0.25                              |                                                                                    |                          |
| Citrate           | M+1             | 0.02                                                                                    | 0.001                      | 0.01                                   | 0.01                                                                               | 0.002                    | 0.01                              |                                                                                    |                          |
| Citrate           | M+2             | 0.09                                                                                    | 0                          | 0.08                                   | 0.62                                                                               | 0.004                    | 0.64                              |                                                                                    |                          |
| Citrate           | M+3             | 0.09                                                                                    | 0.001                      | 0.1                                    | 0.02                                                                               | 0                        | 0.01                              |                                                                                    |                          |
| Citrate           | M+4             | 0.58                                                                                    | 0.011                      | 0.58                                   | 0.08                                                                               | 0.004                    | 0.07                              |                                                                                    |                          |
| Citrate           | M+5             | 0.15                                                                                    | 0.008                      | 0.15                                   | 0.02                                                                               | 0.001                    | 0.03                              |                                                                                    |                          |
| Citrate           | M+6             | 0.04                                                                                    | 0.002                      | 0.06                                   | 0                                                                                  | 0                        | 0                                 |                                                                                    |                          |
| AKG               | M+0             | 0.03                                                                                    | 0.003                      | 0                                      | 0.88                                                                               | 0.003                    | 0.9                               |                                                                                    |                          |
| AKG               | M+1             | 0                                                                                       | 0                          | 0.01                                   | 0                                                                                  | 0.003                    | 0                                 |                                                                                    |                          |
| AKG               | M+2             | 0.01                                                                                    | 0                          | 0.01                                   | 0.1                                                                                | 0.001                    | 0.09                              |                                                                                    |                          |
| AKG               | M+3             | 0.07                                                                                    | 0.001                      | 0.09                                   | 0.01                                                                               | 0.001                    | 0.01                              |                                                                                    |                          |
| AKG               | M+4             | 0                                                                                       | 0                          | 0                                      | 0.01                                                                               | 0                        | 0.01                              |                                                                                    |                          |
| AKG               | M+5             | 0.89                                                                                    | 0.004                      | 0.89                                   | 0                                                                                  | 0                        | 0                                 |                                                                                    |                          |
| Glutamine         | M+0             | 0.01                                                                                    | 0.001                      | 0                                      | 1                                                                                  | 0.001                    | 1                                 |                                                                                    |                          |
| Glutamine         | M+1             | 0                                                                                       | 0                          | 0                                      | 0                                                                                  | 0                        | 0                                 |                                                                                    |                          |
| Glutamine         | M+2             | 0                                                                                       | 0                          | 0                                      | 0                                                                                  | 0                        | 0                                 |                                                                                    |                          |
| Glutamine         | M+3             | 0                                                                                       | 0                          | 0                                      | 0                                                                                  | 0                        | 0                                 |                                                                                    |                          |
| Glutamine         | M+4             | 0                                                                                       | 0                          | 0                                      | 0                                                                                  | 0                        | 0                                 |                                                                                    |                          |
| Glutamine         | M+5             | 0.99                                                                                    | 0.001                      | 1                                      | 0                                                                                  | 0                        | 0                                 |                                                                                    |                          |
| Glutamate media   | M+0             | 0.07                                                                                    | 0.002                      | 0                                      | 0.94                                                                               | 0.01                     | 0.91                              |                                                                                    |                          |
| Glutamate media   | M+1             | 0                                                                                       | 0                          | 0.01                                   | 0                                                                                  | 0                        | 0                                 |                                                                                    |                          |
| Glutamate media   | M+2             | 0                                                                                       | 0                          | 0.01                                   | 0.05                                                                               | 0.008                    | 0.08                              |                                                                                    |                          |
| Glutamate media   | M+3             | 0.04                                                                                    | 0.001                      | 0.08                                   | 0                                                                                  | 0.004                    | 0                                 |                                                                                    |                          |
| Glutamate media   | M+4             | 0                                                                                       | 0                          | 0                                      | 0                                                                                  | 0                        | 0.01                              |                                                                                    |                          |
| Glutamate media   | M+5             | 0.88                                                                                    | 0.003                      | 0.9                                    | 0                                                                                  | 0                        | 0                                 |                                                                                    |                          |
| Glutamate         | M+0             | 0.03                                                                                    | 0.001                      | 0                                      | 0.87                                                                               | 0.002                    | 0.91                              |                                                                                    |                          |
| Glutamate         | M+1             | 0                                                                                       | 0.001                      | 0.01                                   | 0                                                                                  | 0                        | 0                                 |                                                                                    |                          |
| Glutamate         | M+2             | 0.01                                                                                    | 0                          | 0.01                                   | 0.1                                                                                | 0.002                    | 0.08                              |                                                                                    |                          |
| Glutamate         | M+3             | 0.08                                                                                    | 0.002                      | 0.08                                   | 0.01                                                                               | 0                        | 0                                 |                                                                                    |                          |
| Glutamate         | M+4             | 0                                                                                       | 0.001                      | 0                                      | 0.01                                                                               | 0                        | 0.01                              |                                                                                    |                          |

|               |      |      |       |      |      |       |      |
|---------------|------|------|-------|------|------|-------|------|
| Glutamate     | M+5  | 0.88 | 0.003 | 0.9  | 0    | 0     | 0    |
| Fumarate      | M+0  | 0.07 | 0.003 | 0.02 | 0.91 | 0.01  | 0.88 |
| Fumarate      | M+1  | 0.01 | 0.003 | 0.01 | 0    | 0.001 | 0    |
| Fumarate      | M+2  | 0.07 | 0.006 | 0.1  | 0.08 | 0.007 | 0.09 |
| Fumarate      | M+3  | 0.08 | 0.005 | 0.09 | 0.02 | 0.006 | 0.03 |
| Fumarate      | M+4  | 0.78 | 0.009 | 0.78 | 0    | 0     | 0    |
| Asparagine    | M+0  | 0.07 | 0.006 | 0.03 | 0.89 | 0.005 | 0.87 |
| Asparagine    | M+1  | 0.01 | 0.001 | 0.01 | 0.01 | 0.001 | 0    |
| Asparagine    | M+2  | 0.08 | 0.041 | 0.09 | 0.08 | 0.004 | 0.09 |
| Asparagine    | M+3  | 0.12 | 0.004 | 0.11 | 0.02 | 0     | 0.03 |
| Asparagine    | M+4  | 0.73 | 0.038 | 0.75 | 0    | 0.001 | 0    |
| Aspartate     | M+0  | 0.05 | 0.001 | 0.03 | 0.82 | 0.011 | 0.87 |
| Aspartate     | M+1  | 0.01 | 0.001 | 0.01 | 0.02 | 0.004 | 0    |
| Aspartate     | M+2  | 0.08 | 0.001 | 0.09 | 0.13 | 0.007 | 0.09 |
| Aspartate     | M+3  | 0.1  | 0.004 | 0.11 | 0.03 | 0.001 | 0.03 |
| Aspartate     | M+4  | 0.76 | 0.004 | 0.75 | 0    | 0.001 | 0    |
| CarAsp        | M+0  | 0.05 | 0.007 | 0.03 |      |       |      |
| CarAsp        | M+1  | 0    | 0     | 0.01 |      |       |      |
| CarAsp        | M+2  | 0.03 | 0.033 | 0.09 |      |       |      |
| CarAsp        | M+3  | 0.12 | 0.001 | 0.11 |      |       |      |
| CarAsp        | M+4  | 0.8  | 0.033 | 0.75 |      |       |      |
| CarAsp        | M+5  | 0    | 0     | 0    |      |       |      |
| Malate        | M+0  | 0.05 | 0.003 | 0.02 | 0.86 | 0.005 | 0.87 |
| Malate        | M+1  | 0.01 | 0.001 | 0.01 | 0.01 | 0.002 | 0    |
| Malate        | M+2  | 0.08 | 0.006 | 0.09 | 0.1  | 0.002 | 0.09 |
| Malate        | M+3  | 0.1  | 0.001 | 0.1  | 0.02 | 0.001 | 0.03 |
| Malate        | M+4  | 0.77 | 0.007 | 0.77 | 0    | 0     | 0    |
| Palmitic acid | M+0  | 0.94 | 0.003 |      | 0.95 | 0.002 |      |
| Palmitic acid | M+1  | 0    | 0.002 |      | 0    | 0     |      |
| Palmitic acid | M+2  | 0.02 | 0.001 |      | 0.01 | 0     |      |
| Palmitic acid | M+3  | 0    | 0     |      | 0    | 0     |      |
| Palmitic acid | M+4  | 0.01 | 0.001 |      | 0    | 0     |      |
| Palmitic acid | M+5  | 0    | 0     |      | 0    | 0     |      |
| Palmitic acid | M+6  | 0.01 | 0.001 |      | 0.01 | 0     |      |
| Palmitic acid | M+7  | 0    | 0     |      | 0    | 0     |      |
| Palmitic acid | M+8  | 0.01 | 0.001 |      | 0.01 | 0     |      |
| Palmitic acid | M+9  | 0    | 0     |      | 0    | 0     |      |
| Palmitic acid | M+10 | 0.01 | 0     |      | 0.01 | 0.001 |      |
| Palmitic acid | M+11 | 0    | 0     |      | 0    | 0     |      |
| Palmitic acid | M+12 | 0    | 0     |      | 0.01 | 0     |      |
| Palmitic acid | M+13 | 0    | 0     |      | 0    | 0     |      |
| Palmitic acid | M+14 | 0    | 0     |      | 0    | 0     |      |
| Palmitic acid | M+15 | 0    | 0     |      | 0    | 0     |      |
| Palmitic acid | M+16 | 0    | 0     |      | 0    | 0     |      |
| Acetyl-CoA    | M+0  | 0.63 | 0.017 |      | 0.05 | 0.004 |      |
| Acetyl-CoA    | M+1  | 0.05 | 0.008 |      | 0    | 0.002 |      |
| Acetyl-CoA    | M+2  | 0.29 | 0.014 |      | 0.09 | 0.002 |      |
| Acetyl-CoA    | M+3  | 0.02 | 0.002 |      | 0.01 | 0.004 |      |
| Acetyl-CoA    | M+4  | 0.01 | 0.001 |      | 0.01 | 0.004 |      |
| Acetyl-CoA    | M+5  | 0    | 0.001 |      | 0.26 | 0.007 |      |
| Acetyl-CoA    | M+6  | 0    | 0.001 |      | 0.05 | 0.007 |      |
| Acetyl-CoA    | M+7  | 0    | 0     |      | 0.43 | 0.015 |      |
| Acetyl-CoA    | M+8  | 0    | 0     |      | 0.05 | 0.002 |      |
| Acetyl-CoA    | M+9  | 0    | 0     |      | 0.03 | 0.001 |      |
| Acetyl-CoA    | M+10 | 0    | 0.001 |      | 0    | 0.001 |      |
| Acetyl-CoA    | M+11 | 0    | 0     |      | 0    | 0.001 |      |
| Acetyl-CoA    | M+12 | 0    | 0     |      | 0    | 0     |      |
| Acetyl-CoA    | M+13 | 0    | 0     |      | 0    | 0     |      |
| Acetyl-CoA    | M+14 | 0    | 0     |      | 0    | 0     |      |
| Acetyl-CoA    | M+15 | 0    | 0     |      | 0    | 0     |      |

|            |      |      |       |      |       |
|------------|------|------|-------|------|-------|
| Acetyl-CoA | M+16 | 0    | 0     | 0    | 0     |
| Acetyl-CoA | M+17 | 0    | 0     | 0    | 0     |
| Acetyl-CoA | M+18 | 0    | 0     | 0    | 0     |
| Acetyl-CoA | M+19 | 0    | 0     | 0    | 0     |
| Acetyl-CoA | M+20 | 0    | 0     | 0    | 0     |
| Acetyl-CoA | M+21 | 0    | 0     | 0    | 0     |
| Acetyl-CoA | M+22 | 0    | 0     | 0    | 0     |
| Acetyl-CoA | M+23 | 0    | 0     | 0    | 0     |
| CoA        | M+0  | 0.86 | 0.004 | 0.13 | 0.011 |
| CoA        | M+1  | 0.07 | 0.001 | 0.01 | 0.003 |
| CoA        | M+2  | 0.06 | 0.001 | 0.02 | 0.005 |
| CoA        | M+3  | 0    | 0.005 | 0.02 | 0.004 |
| CoA        | M+4  | 0    | 0.001 | 0.01 | 0.003 |
| CoA        | M+5  | 0.01 | 0.001 | 0.67 | 0.017 |
| CoA        | M+6  | 0    | 0.001 | 0.08 | 0.003 |
| CoA        | M+7  | 0    | 0     | 0.04 | 0.005 |
| CoA        | M+8  | 0    | 0     | 0.01 | 0.001 |
| CoA        | M+9  | 0    | 0     | 0    | 0     |
| CoA        | M+10 | 0    | 0     | 0    | 0     |
| CoA        | M+11 | 0    | 0     | 0    | 0     |
| CoA        | M+12 | 0    | 0     | 0    | 0     |
| CoA        | M+13 | 0    | 0.002 | 0    | 0     |
| CoA        | M+14 | 0    | 0.002 | 0    | 0     |
| CoA        | M+15 | 0    | 0     | 0    | 0     |
| CoA        | M+16 | 0    | 0     | 0    | 0     |
| CoA        | M+17 | 0    | 0     | 0    | 0     |
| CoA        | M+18 | 0    | 0     | 0    | 0     |
| CoA        | M+19 | 0    | 0     | 0    | 0     |
| CoA        | M+20 | 0    | 0     | 0    | 0     |
| CoA        | M+21 | 0    | 0     | 0    | 0     |

**Supplementary Table 4. The fractional labeling of metabolites when feeding A549 cells with [U-13C]-glucose and [U-13C]-glutamine for 24 h.**

| Metabolite        | Mass-isotopomer | Glutamine<br>(measured mean -<br>after natural<br>abundance and<br>impurity correction) | Glutamine<br>(measured SD) | Glutamine<br>(simulated best<br>match) | Glucose<br>(measured mean - after<br>natural abundance and<br>impurity correction) | Glucose<br>(measured<br>SD) | Glucose<br>(simulated best<br>match) | Lactate<br>(measured mean -<br>after natural<br>abundance and<br>impurity correction) | Lactate<br>(measured SD) |
|-------------------|-----------------|-----------------------------------------------------------------------------------------|----------------------------|----------------------------------------|------------------------------------------------------------------------------------|-----------------------------|--------------------------------------|---------------------------------------------------------------------------------------|--------------------------|
| 6phosphogluconate | M+0             | 0.97                                                                                    | 0.007                      | 1                                      | 0.08                                                                               | 0.007                       | 0.07                                 |                                                                                       |                          |
| 6phosphogluconate | M+1             | 0                                                                                       | 0.004                      | 0                                      | 0                                                                                  | 0.002                       | 0                                    |                                                                                       |                          |
| 6phosphogluconate | M+2             | 0                                                                                       | 0                          | 0                                      | 0                                                                                  | 0                           | 0                                    |                                                                                       |                          |
| 6phosphogluconate | M+3             | 0                                                                                       | 0                          | 0                                      | 0                                                                                  | 0                           | 0                                    |                                                                                       |                          |
| 6phosphogluconate | M+4             | 0                                                                                       | 0                          | 0                                      | 0                                                                                  | 0                           | 0                                    |                                                                                       |                          |
| 6phosphogluconate | M+5             | 0                                                                                       | 0.002                      | 0                                      | 0.02                                                                               | 0.004                       | 0.03                                 |                                                                                       |                          |
| 6phosphogluconate | M+6             | 0.02                                                                                    | 0.004                      | 0                                      | 0.9                                                                                | 0.007                       | 0.9                                  |                                                                                       |                          |
| Lactate           | M+0             | 0.99                                                                                    | 0                          | 0.96                                   | 0.1                                                                                | 0.021                       | 0.1                                  | 0.98                                                                                  | 0.001                    |
| Lactate           | M+1             | 0                                                                                       | 0                          | 0                                      | 0                                                                                  | 0.001                       | 0                                    | 0.01                                                                                  | 0                        |
| Lactate           | M+2             | 0                                                                                       | 0                          | 0.01                                   | 0                                                                                  | 0.002                       | 0                                    | 0                                                                                     | 0                        |
| Lactate           | M+3             | 0.01                                                                                    | 0.001                      | 0.03                                   | 0.9                                                                                | 0.021                       | 0.89                                 | 0.01                                                                                  | 0.001                    |
| PEP               | M+0             | 0.99                                                                                    | 0.006                      | 1                                      | 0.04                                                                               | 0.006                       | 0.07                                 |                                                                                       |                          |
| PEP               | M+1             | 0                                                                                       | 0.004                      | 0                                      | 0                                                                                  | 0.001                       | 0                                    |                                                                                       |                          |
| PEP               | M+2             | 0                                                                                       | 0                          | 0                                      | 0                                                                                  | 0                           | 0                                    |                                                                                       |                          |
| PEP               | M+3             | 0.01                                                                                    | 0.005                      | 0                                      | 0.96                                                                               | 0.007                       | 0.93                                 |                                                                                       |                          |
| Pyruvate          | M+0             | 0.98                                                                                    | 0.003                      | 0.96                                   | 0.21                                                                               | 0.026                       | 0.1                                  | 0.97                                                                                  | 0.001                    |
| Pyruvate          | M+1             | 0.01                                                                                    | 0.002                      | 0                                      | 0                                                                                  | 0                           | 0                                    | 0.03                                                                                  | 0.001                    |
| Pyruvate          | M+2             | 0                                                                                       | 0                          | 0.01                                   | 0                                                                                  | 0.001                       | 0                                    | 0                                                                                     | 0                        |
| Pyruvate          | M+3             | 0.01                                                                                    | 0.002                      | 0.03                                   | 0.79                                                                               | 0.025                       | 0.89                                 | 0.003                                                                                 | 0.002                    |
| Alanine           | M+0             | 0.96                                                                                    | 0.006                      | 0.95                                   | 0.16                                                                               | 0.024                       | 0.16                                 |                                                                                       |                          |
| Alanine           | M+1             | 0                                                                                       | 0.004                      | 0                                      | 0                                                                                  | 0.004                       | 0                                    |                                                                                       |                          |
| Alanine           | M+2             | 0                                                                                       | 0.001                      | 0.01                                   | 0                                                                                  | 0.006                       | 0                                    |                                                                                       |                          |
| Alanine           | M+3             | 0.04                                                                                    | 0.003                      | 0.04                                   | 0.84                                                                               | 0.03                        | 0.84                                 |                                                                                       |                          |
| Citrate           | M+0             | 0.03                                                                                    | 0.045                      | 0.03                                   | 0.26                                                                               | 0.036                       | 0.26                                 |                                                                                       |                          |
| Citrate           | M+1             | 0.01                                                                                    | 0.003                      | 0                                      | 0.01                                                                               | 0.001                       | 0                                    |                                                                                       |                          |
| Citrate           | M+2             | 0.05                                                                                    | 0.002                      | 0.04                                   | 0.66                                                                               | 0.033                       | 0.67                                 |                                                                                       |                          |
| Citrate           | M+3             | 0.11                                                                                    | 0.007                      | 0.11                                   | 0.01                                                                               | 0.001                       | 0.01                                 |                                                                                       |                          |
| Citrate           | M+4             | 0.59                                                                                    | 0.024                      | 0.6                                    | 0.04                                                                               | 0.002                       | 0.03                                 |                                                                                       |                          |
| Citrate           | M+5             | 0.18                                                                                    | 0.007                      | 0.18                                   | 0.02                                                                               | 0.001                       | 0.03                                 |                                                                                       |                          |
| Citrate           | M+6             | 0.03                                                                                    | 0.003                      | 0.04                                   | 0                                                                                  | 0                           | 0                                    |                                                                                       |                          |
| AKG               | M+0             | 0.03                                                                                    | 0.002                      | 0                                      | 0.92                                                                               | 0.002                       | 0.93                                 |                                                                                       |                          |
| AKG               | M+1             | 0                                                                                       | 0.001                      | 0                                      | 0                                                                                  | 0.003                       | 0                                    |                                                                                       |                          |
| AKG               | M+2             | 0                                                                                       | 0                          | 0.01                                   | 0.07                                                                               | 0.003                       | 0.06                                 |                                                                                       |                          |
| AKG               | M+3             | 0.04                                                                                    | 0.001                      | 0.06                                   | 0                                                                                  | 0.001                       | 0                                    |                                                                                       |                          |
| AKG               | M+4             | 0                                                                                       | 0.001                      | 0                                      | 0                                                                                  | 0                           | 0                                    |                                                                                       |                          |
| AKG               | M+5             | 0.92                                                                                    | 0.001                      | 0.93                                   | 0                                                                                  | 0                           | 0                                    |                                                                                       |                          |
| Glutamine         | M+0             | 0.01                                                                                    | 0.001                      | 0                                      | 1                                                                                  | 0.001                       | 0.99                                 |                                                                                       |                          |
| Glutamine         | M+1             | 0                                                                                       | 0                          | 0                                      | 0                                                                                  | 0.001                       | 0                                    |                                                                                       |                          |
| Glutamine         | M+2             | 0                                                                                       | 0                          | 0                                      | 0                                                                                  | 0                           | 0.01                                 |                                                                                       |                          |
| Glutamine         | M+3             | 0                                                                                       | 0                          | 0.01                                   | 0                                                                                  | 0                           | 0                                    |                                                                                       |                          |
| Glutamine         | M+4             | 0                                                                                       | 0.001                      | 0                                      | 0                                                                                  | 0                           | 0                                    |                                                                                       |                          |
| Glutamine         | M+5             | 0.99                                                                                    | 0                          | 0.99                                   | 0                                                                                  | 0                           | 0                                    |                                                                                       |                          |
| Glutamate media   | M+0             | 0.07                                                                                    | 0.001                      | 0                                      | 0.95                                                                               | 0.001                       | 0.94                                 |                                                                                       |                          |
| Glutamate media   | M+1             | 0                                                                                       | 0                          | 0                                      | 0                                                                                  | 0.001                       | 0                                    |                                                                                       |                          |
| Glutamate media   | M+2             | 0                                                                                       | 0                          | 0.01                                   | 0.04                                                                               | 0.001                       | 0.06                                 |                                                                                       |                          |
| Glutamate media   | M+3             | 0.03                                                                                    | 0.001                      | 0.06                                   | 0                                                                                  | 0                           | 0                                    |                                                                                       |                          |
| Glutamate media   | M+4             | 0                                                                                       | 0.001                      | 0                                      | 0                                                                                  | 0                           | 0                                    |                                                                                       |                          |
| Glutamate media   | M+5             | 0.9                                                                                     | 0                          | 0.93                                   | 0                                                                                  | 0                           | 0                                    |                                                                                       |                          |



|               |      |      |       |      |      |       |      |
|---------------|------|------|-------|------|------|-------|------|
| Glutamate     | M+0  | 0.03 | 0.001 | 0    | 0.93 | 0.001 | 0.94 |
| Glutamate     | M+1  | 0    | 0     | 0    | 0    | 0     | 0    |
| Glutamate     | M+2  | 0    | 0     | 0.01 | 0.06 | 0.001 | 0.05 |
| Glutamate     | M+3  | 0.04 | 0     | 0.05 | 0    | 0     | 0    |
| Glutamate     | M+4  | 0    | 0.001 | 0    | 0    | 0     | 0    |
| Glutamate     | M+5  | 0.92 | 0.001 | 0.93 | 0    | 0     | 0    |
| Fumarate      | M+0  | 0.06 | 0.016 | 0.03 | 0.94 | 0.003 | 0.92 |
| Fumarate      | M+1  | 0.01 | 0.001 | 0    | 0.01 | 0.003 | 0    |
| Fumarate      | M+2  | 0.04 | 0.002 | 0.05 | 0.05 | 0.003 | 0.05 |
| Fumarate      | M+3  | 0.1  | 0.01  | 0.11 | 0    | 0     | 0.02 |
| Fumarate      | M+4  | 0.8  | 0.004 | 0.81 | 0    | 0     | 0    |
| Aspartate     | M+0  | 0.08 | 0.001 | 0.04 | 0.92 | 0.002 | 0.91 |
| Aspartate     | M+1  | 0    | 0.001 | 0    | 0    | 0.001 | 0    |
| Aspartate     | M+2  | 0.04 | 0.001 | 0.05 | 0.05 | 0.001 | 0.05 |
| Aspartate     | M+3  | 0.15 | 0.002 | 0.16 | 0.02 | 0.002 | 0.03 |
| Aspartate     | M+4  | 0.72 | 0.001 | 0.74 | 0    | 0     | 0    |
| CarAsp        | M+0  | 0.06 | 0.009 | 0.04 | 0.98 | 0.027 | 0.92 |
| CarAsp        | M+1  | 0    | 0     | 0    | 0    | 0.009 | 0    |
| CarAsp        | M+2  | 0    | 0.002 | 0.05 | 0.01 | 0.014 | 0.05 |
| CarAsp        | M+3  | 0.15 | 0.013 | 0.16 | 0.01 | 0.006 | 0.03 |
| CarAsp        | M+4  | 0.78 | 0.02  | 0.74 | 0    | 0     | 0    |
| CarAsp        | M+5  | 0    | 0     | 0    | 0    | 0     | 0    |
| Malate        | M+0  | 0.08 | 0.003 | 0.03 | 0.92 | 0.002 | 0.92 |
| Malate        | M+1  | 0    | 0     | 0    | 0    | 0.001 | 0    |
| Malate        | M+2  | 0.04 | 0.001 | 0.05 | 0.05 | 0.001 | 0.05 |
| Malate        | M+3  | 0.14 | 0.003 | 0.15 | 0.02 | 0.001 | 0.03 |
| Malate        | M+4  | 0.74 | 0.007 | 0.76 | 0    | 0     | 0    |
| Palmitic acid | M+0  | 0.74 | 0.003 | 0.03 | 0.75 | 0.015 | 0.92 |
| Palmitic acid | M+1  | 0    | 0.001 | 0    | 0    | 0.002 | 0    |
| Palmitic acid | M+2  | 0.08 | 0.002 | 0.04 | 0.01 | 0.001 | 0.05 |
| Palmitic acid | M+3  | 0    | 0     | 0    | 0    | 0     | 0    |
| Palmitic acid | M+4  | 0.07 | 0.001 | 0.04 | 0.01 | 0     | 0    |
| Palmitic acid | M+5  | 0    | 0     | 0    | 0    | 0     | 0    |
| Palmitic acid | M+6  | 0.05 | 0.001 | 0.04 | 0.02 | 0.001 | 0.05 |
| Palmitic acid | M+7  | 0    | 0     | 0    | 0    | 0     | 0    |
| Palmitic acid | M+8  | 0.03 | 0.001 | 0.04 | 0.04 | 0.001 | 0.03 |
| Palmitic acid | M+9  | 0    | 0     | 0    | 0    | 0.001 | 0    |
| Palmitic acid | M+10 | 0.02 | 0     | 0.04 | 0.06 | 0.003 | 0.02 |
| Palmitic acid | M+11 | 0    | 0     | 0    | 0    | 0.001 | 0    |
| Palmitic acid | M+12 | 0.01 | 0.001 | 0.04 | 0.06 | 0.004 | 0.01 |
| Palmitic acid | M+13 | 0    | 0     | 0    | 0    | 0.001 | 0    |
| Palmitic acid | M+14 | 0    | 0     | 0    | 0.04 | 0.003 | 0    |
| Palmitic acid | M+15 | 0    | 0     | 0    | 0    | 0.001 | 0    |
| Palmitic acid | M+16 | 0    | 0     | 0    | 0.01 | 0.001 | 0    |
| Acetyl-CoA    | M+0  | 0.57 | 0.019 | 0.03 | 0.03 | 0     | 0.57 |
| Acetyl-CoA    | M+1  | 0.05 | 0.01  | 0.03 | 0    | 0.003 | 0.05 |
| Acetyl-CoA    | M+2  | 0.33 | 0.017 | 0.03 | 0.06 | 0.002 | 0.33 |
| Acetyl-CoA    | M+3  | 0.03 | 0.008 | 0.03 | 0.01 | 0.004 | 0.03 |
| Acetyl-CoA    | M+4  | 0.02 | 0.001 | 0.03 | 0.02 | 0.004 | 0.02 |
| Acetyl-CoA    | M+5  | 0    | 0.001 | 0.03 | 0.28 | 0.009 | 0    |
| Acetyl-CoA    | M+6  | 0    | 0     | 0.03 | 0.02 | 0.005 | 0    |
| Acetyl-CoA    | M+7  | 0    | 0     | 0.03 | 0.51 | 0.008 | 0    |
| Acetyl-CoA    | M+8  | 0    | 0     | 0.03 | 0.03 | 0.001 | 0    |
| Acetyl-CoA    | M+9  | 0    | 0     | 0.03 | 0.04 | 0.005 | 0    |
| Acetyl-CoA    | M+10 | 0    | 0     | 0.03 | 0    | 0     | 0    |

|            |      |      |       |      |       |
|------------|------|------|-------|------|-------|
| Acetyl-CoA | M+11 | 0    | 0     | 0    | 0     |
| Acetyl-CoA | M+12 | 0    | 0     | 0    | 0     |
| Acetyl-CoA | M+13 | 0    | 0     | 0    | 0     |
| Acetyl-CoA | M+14 | 0    | 0     | 0    | 0     |
| Acetyl-CoA | M+15 | 0    | 0     | 0    | 0     |
| Acetyl-CoA | M+16 | 0    | 0     | 0    | 0     |
| Acetyl-CoA | M+17 | 0    | 0     | 0    | 0     |
| Acetyl-CoA | M+18 | 0    | 0     | 0    | 0     |
| Acetyl-CoA | M+19 | 0    | 0     | 0    | 0     |
| Acetyl-CoA | M+20 | 0    | 0     | 0    | 0     |
| Acetyl-CoA | M+21 | 0    | 0     | 0    | 0     |
| Acetyl-CoA | M+22 | 0    | 0     | 0    | 0     |
| Acetyl-CoA | M+23 | 0    | 0     | 0    | 0     |
| CoA        | M+0  | 0.84 | 0.009 | 0.09 | 0.015 |
| CoA        | M+1  | 0.06 | 0.002 | 0.01 | 0.002 |
| CoA        | M+2  | 0.07 | 0.004 | 0.02 | 0.002 |
| CoA        | M+3  | 0    | 0.005 | 0.01 | 0.003 |
| CoA        | M+4  | 0    | 0.001 | 0    | 0.003 |
| CoA        | M+5  | 0.02 | 0.003 | 0.76 | 0.009 |
| CoA        | M+6  | 0    | 0     | 0.04 | 0.005 |
| CoA        | M+7  | 0    | 0.001 | 0.05 | 0.006 |
| CoA        | M+8  | 0    | 0     | 0    | 0.002 |
| CoA        | M+9  | 0    | 0     | 0    | 0     |
| CoA        | M+10 | 0    | 0     | 0    | 0     |
| CoA        | M+11 | 0    | 0     | 0    | 0     |
| CoA        | M+12 | 0    | 0     | 0    | 0     |
| CoA        | M+13 | 0    | 0     | 0    | 0     |
| CoA        | M+14 | 0    | 0     | 0    | 0     |
| CoA        | M+15 | 0    | 0     | 0    | 0     |
| CoA        | M+16 | 0    | 0     | 0    | 0     |
| CoA        | M+17 | 0    | 0     | 0    | 0     |
| CoA        | M+18 | 0    | 0     | 0    | 0     |
| CoA        | M+19 | 0    | 0     | 0    | 0     |
| CoA        | M+20 | 0    | 0     | 0    | 0     |
| CoA        | M+21 | 0    | 0     | 0    | 0     |

**Supplementary Table 5. The fractional labeling of metabolites when feeding LN229 cells with [U-13C]-glucose and [U-13C]-glutamine for 24 h.**

| Metabolite        | Mass-isotopomer | Glutamine<br>(measured mean -<br>after natural<br>abundance and<br>impurity correction) | Glutamine<br>(measured SD) | Glutamine<br>(simulated<br>best match) | Glucose<br>(measured mean -<br>after natural<br>abundance and<br>impurity correction) | Glucose<br>(measured SD) | Glucose<br>(simulated<br>best match) | Lactate<br>(measured mean -<br>after natural<br>abundance and<br>impurity correction) | Lactate<br>(measured SD) |
|-------------------|-----------------|-----------------------------------------------------------------------------------------|----------------------------|----------------------------------------|---------------------------------------------------------------------------------------|--------------------------|--------------------------------------|---------------------------------------------------------------------------------------|--------------------------|
| 6phosphogluconate | M+0             | 0.98                                                                                    | 0.003                      | 1                                      | 0.03                                                                                  | 0.004                    | 0.04                                 |                                                                                       |                          |
| 6phosphogluconate | M+1             | 0                                                                                       | 0.001                      | 0                                      | 0                                                                                     | 0.001                    | 0                                    |                                                                                       |                          |
| 6phosphogluconate | M+2             | 0.02                                                                                    | 0.002                      | 0                                      | 0                                                                                     | 0                        | 0                                    |                                                                                       |                          |
| 6phosphogluconate | M+3             | 0                                                                                       | 0                          | 0                                      | 0                                                                                     | 0                        | 0                                    |                                                                                       |                          |
| 6phosphogluconate | M+4             | 0                                                                                       | 0                          | 0                                      | 0                                                                                     | 0                        | 0                                    |                                                                                       |                          |
| 6phosphogluconate | M+5             | 0                                                                                       | 0                          | 0                                      | 0.01                                                                                  | 0.002                    | 0.01                                 |                                                                                       |                          |
| 6phosphogluconate | M+6             | 0.01                                                                                    | 0.002                      | 0                                      | 0.96                                                                                  | 0.006                    | 0.95                                 |                                                                                       |                          |
| Lactate           | M+0             | 0.99                                                                                    | 0.001                      | 0.98                                   | 0.11                                                                                  | 0.012                    | 0.05                                 | 0.98                                                                                  | 0.002                    |
| Lactate           | M+1             | 0                                                                                       | 0.001                      | 0                                      | 0                                                                                     | 0                        | 0                                    | 0.01                                                                                  | 0.001                    |
| Lactate           | M+2             | 0                                                                                       | 0                          | 0                                      | 0                                                                                     | 0.001                    | 0                                    | 0                                                                                     | 0                        |
| Lactate           | M+3             | 0.01                                                                                    | 0                          | 0.01                                   | 0.89                                                                                  | 0.012                    | 0.95                                 | 0.01                                                                                  | 0.001                    |
| PEP               | M+0             | 1                                                                                       | 0.002                      | 1                                      | 0.02                                                                                  | 0.003                    | 0.04                                 |                                                                                       |                          |
| PEP               | M+1             | 0                                                                                       | 0.002                      | 0                                      | 0                                                                                     | 0.001                    | 0                                    |                                                                                       |                          |
| PEP               | M+2             | 0                                                                                       | 0                          | 0                                      | 0                                                                                     | 0                        | 0                                    |                                                                                       |                          |
| PEP               | M+3             | 0                                                                                       | 0.001                      | 0                                      | 0.98                                                                                  | 0.003                    | 0.96                                 |                                                                                       |                          |
| Pyruvate          | M+0             | 0.98                                                                                    | 0.002                      | 0.98                                   | 0.22                                                                                  | 0.116                    | 0.05                                 | 0.97                                                                                  | 0.002                    |
| Pyruvate          | M+1             | 0.01                                                                                    | 0.001                      | 0                                      | 0                                                                                     | 0.006                    | 0                                    | 0.02                                                                                  | 0.001                    |
| Pyruvate          | M+2             | 0                                                                                       | 0                          | 0                                      | 0                                                                                     | 0.002                    | 0                                    | 0                                                                                     | 0                        |
| Pyruvate          | M+3             | 0.02                                                                                    | 0.002                      | 0.01                                   | 0.77                                                                                  | 0.119                    | 0.95                                 | 0.01                                                                                  | 0.002                    |
| Alanine           | M+0             | 0.93                                                                                    | 0.001                      | 0.93                                   | 0.16                                                                                  | 0.011                    | 0.16                                 |                                                                                       |                          |
| Alanine           | M+1             | 0                                                                                       | 0.004                      | 0                                      | 0                                                                                     | 0.002                    | 0                                    |                                                                                       |                          |
| Alanine           | M+2             | 0.01                                                                                    | 0.002                      | 0.01                                   | 0                                                                                     | 0.004                    | 0                                    |                                                                                       |                          |
| Alanine           | M+3             | 0.06                                                                                    | 0.002                      | 0.06                                   | 0.83                                                                                  | 0.014                    | 0.84                                 |                                                                                       |                          |
| Citrate           | M+0             | 0.03                                                                                    | 0.002                      | 0.03                                   | 0.24                                                                                  | 0.003                    | 0.24                                 |                                                                                       |                          |
| Citrate           | M+1             | 0.02                                                                                    | 0.001                      | 0.01                                   | 0.01                                                                                  | 0                        | 0.01                                 |                                                                                       |                          |
| Citrate           | M+2             | 0.09                                                                                    | 0                          | 0.07                                   | 0.64                                                                                  | 0.003                    | 0.65                                 |                                                                                       |                          |
| Citrate           | M+3             | 0.09                                                                                    | 0.002                      | 0.09                                   | 0.02                                                                                  | 0.001                    | 0.01                                 |                                                                                       |                          |
| Citrate           | M+4             | 0.59                                                                                    | 0.001                      | 0.59                                   | 0.07                                                                                  | 0.001                    | 0.06                                 |                                                                                       |                          |
| Citrate           | M+5             | 0.15                                                                                    | 0.002                      | 0.16                                   | 0.02                                                                                  | 0                        | 0.03                                 |                                                                                       |                          |
| Citrate           | M+6             | 0.04                                                                                    | 0                          | 0.04                                   | 0                                                                                     | 0                        | 0                                    |                                                                                       |                          |
| AKG               | M+0             | 0.04                                                                                    | 0.003                      | 0                                      | 0.9                                                                                   | 0.007                    | 0.89                                 |                                                                                       |                          |
| AKG               | M+1             | 0                                                                                       | 0.001                      | 0.01                                   | 0                                                                                     | 0.004                    | 0                                    |                                                                                       |                          |
| AKG               | M+2             | 0.01                                                                                    | 0                          | 0.01                                   | 0.09                                                                                  | 0.002                    | 0.1                                  |                                                                                       |                          |
| AKG               | M+3             | 0.08                                                                                    | 0.005                      | 0.09                                   | 0.01                                                                                  | 0.002                    | 0.01                                 |                                                                                       |                          |
| AKG               | M+4             | 0                                                                                       | 0.003                      | 0                                      | 0.01                                                                                  | 0.001                    | 0.01                                 |                                                                                       |                          |
| AKG               | M+5             | 0.86                                                                                    | 0.011                      | 0.88                                   | 0                                                                                     | 0                        | 0                                    |                                                                                       |                          |
| Glutamine         | M+0             | 0.02                                                                                    | 0.001                      | 0                                      | 1                                                                                     | 0.001                    | 0.99                                 |                                                                                       |                          |
| Glutamine         | M+1             | 0                                                                                       | 0                          | 0                                      | 0                                                                                     | 0.001                    | 0                                    |                                                                                       |                          |
| Glutamine         | M+2             | 0                                                                                       | 0                          | 0                                      | 0                                                                                     | 0                        | 0.01                                 |                                                                                       |                          |
| Glutamine         | M+3             | 0                                                                                       | 0                          | 0.01                                   | 0                                                                                     | 0                        | 0                                    |                                                                                       |                          |
| Glutamine         | M+4             | 0                                                                                       | 0                          | 0                                      | 0                                                                                     | 0                        | 0                                    |                                                                                       |                          |
| Glutamine         | M+5             | 0.98                                                                                    | 0                          | 0.99                                   | 0                                                                                     | 0                        | 0                                    |                                                                                       |                          |
| Glutamate media   | M+0             | 0.1                                                                                     | 0.002                      | 0                                      | 0.93                                                                                  | 0.001                    | 0.89                                 |                                                                                       |                          |
| Glutamate media   | M+1             | 0                                                                                       | 0                          | 0.01                                   | 0                                                                                     | 0                        | 0                                    |                                                                                       |                          |
| Glutamate media   | M+2             | 0.01                                                                                    | 0                          | 0.01                                   | 0.06                                                                                  | 0.002                    | 0.09                                 |                                                                                       |                          |

|                 |      |      |       |      |      |       |      |
|-----------------|------|------|-------|------|------|-------|------|
| Glutamate media | M+3  | 0.06 | 0.001 | 0.09 | 0    | 0     | 0.01 |
| Glutamate media | M+4  | 0    | 0     | 0    | 0    | 0     | 0.01 |
| Glutamate media | M+5  | 0.83 | 0.003 | 0.89 | 0    | 0     | 0    |
| Glutamate       | M+0  | 0.04 | 0.001 | 0    | 0.89 | 0.004 | 0.89 |
| Glutamate       | M+1  | 0.01 | 0     | 0.01 | 0    | 0.001 | 0    |
| Glutamate       | M+2  | 0.01 | 0.001 | 0.01 | 0.09 | 0.003 | 0.09 |
| Glutamate       | M+3  | 0.08 | 0.001 | 0.09 | 0.01 | 0     | 0.01 |
| Glutamate       | M+4  | 0    | 0     | 0    | 0.01 | 0     | 0.01 |
| Glutamate       | M+5  | 0.86 | 0.002 | 0.88 | 0    | 0     | 0    |
| Fumarate        | M+0  | 0.06 | 0.003 | 0.02 | 0.91 | 0.001 | 0.88 |
| Fumarate        | M+1  | 0.01 | 0.001 | 0.01 | 0.01 | 0.001 | 0.01 |
| Fumarate        | M+2  | 0.07 | 0.002 | 0.09 | 0.08 | 0.001 | 0.08 |
| Fumarate        | M+3  | 0.06 | 0.002 | 0.07 | 0    | 0     | 0.03 |
| Fumarate        | M+4  | 0.79 | 0.005 | 0.8  | 0    | 0.001 | 0    |
| Aspartate       | M+0  | 0.07 | 0.001 | 0.04 | 0.88 | 0.002 | 0.87 |
| Aspartate       | M+1  | 0.01 | 0     | 0.01 | 0.01 | 0.001 | 0.01 |
| Aspartate       | M+2  | 0.08 | 0.002 | 0.09 | 0.08 | 0.001 | 0.08 |
| Aspartate       | M+3  | 0.09 | 0.001 | 0.11 | 0.03 | 0.001 | 0.04 |
| Aspartate       | M+4  | 0.74 | 0.001 | 0.76 | 0    | 0     | 0    |
| CarAsp          | M+0  | 0.08 | 0.01  | 0.04 | 0.97 | 0.024 | 0.87 |
| CarAsp          | M+1  | 0    | 0.007 | 0.01 | 0    | 0.028 | 0.01 |
| CarAsp          | M+2  | 0.05 | 0.021 | 0.09 | 0.02 | 0.009 | 0.08 |
| CarAsp          | M+3  | 0.1  | 0.016 | 0.11 | 0.01 | 0.01  | 0.04 |
| CarAsp          | M+4  | 0.77 | 0.012 | 0.76 | 0    | 0     | 0    |
| CarAsp          | M+5  | 0    | 0     | 0    | 0    | 0     | 0    |
| Malate          | M+0  | 0.07 | 0.002 | 0.03 | 0.88 | 0.006 | 0.87 |
| Malate          | M+1  | 0.01 | 0     | 0.01 | 0.01 | 0.002 | 0.01 |
| Malate          | M+2  | 0.08 | 0.001 | 0.09 | 0.08 | 0.001 | 0.08 |
| Malate          | M+3  | 0.08 | 0.002 | 0.1  | 0.03 | 0.004 | 0.04 |
| Malate          | M+4  | 0.74 | 0.001 | 0.76 | 0    | 0     | 0    |
| Palmitic acid   | M+0  | 0.93 | 0.002 | 0.92 | 0.92 | 0.002 | 0.92 |
| Palmitic acid   | M+1  | 0    | 0.002 | 0    | 0    | 0.001 | 0    |
| Palmitic acid   | M+2  | 0.02 | 0.001 | 0.01 | 0.01 | 0     | 0    |
| Palmitic acid   | M+3  | 0    | 0     | 0    | 0    | 0     | 0    |
| Palmitic acid   | M+4  | 0.02 | 0.001 | 0.01 | 0.01 | 0     | 0    |
| Palmitic acid   | M+5  | 0    | 0     | 0    | 0    | 0     | 0    |
| Palmitic acid   | M+6  | 0.01 | 0     | 0.02 | 0.02 | 0.001 | 0.01 |
| Palmitic acid   | M+7  | 0    | 0     | 0    | 0    | 0     | 0    |
| Palmitic acid   | M+8  | 0.01 | 0     | 0.02 | 0.02 | 0.001 | 0.01 |
| Palmitic acid   | M+9  | 0    | 0     | 0    | 0    | 0     | 0    |
| Palmitic acid   | M+10 | 0.01 | 0     | 0.01 | 0.01 | 0.001 | 0.01 |
| Palmitic acid   | M+11 | 0    | 0     | 0    | 0    | 0     | 0    |
| Palmitic acid   | M+12 | 0    | 0     | 0.01 | 0.01 | 0.001 | 0.01 |
| Palmitic acid   | M+13 | 0    | 0     | 0    | 0    | 0     | 0    |
| Palmitic acid   | M+14 | 0    | 0     | 0    | 0    | 0     | 0    |
| Palmitic acid   | M+15 | 0    | 0     | 0    | 0    | 0     | 0    |
| Palmitic acid   | M+16 | 0    | 0     | 0    | 0    | 0     | 0    |
| Acetyl-CoA      | M+0  | 0.65 | 0.02  | 0.05 | 0.05 | 0.004 | 0.05 |
| Acetyl-CoA      | M+1  | 0.04 | 0.007 | 0    | 0    | 0.001 | 0.04 |
| Acetyl-CoA      | M+2  | 0.27 | 0.012 | 0.07 | 0.07 | 0.004 | 0.07 |
| Acetyl-CoA      | M+3  | 0.03 | 0.005 | 0.01 | 0.01 | 0.004 | 0.01 |
| Acetyl-CoA      | M+4  | 0.01 | 0.01  | 0.01 | 0.01 | 0.005 | 0.01 |

|            |      |      |       |      |       |
|------------|------|------|-------|------|-------|
| Acetyl-CoA | M+5  | 0    | 0.002 | 0.35 | 0.013 |
| Acetyl-CoA | M+6  | 0    | 0.001 | 0.05 | 0.002 |
| Acetyl-CoA | M+7  | 0    | 0     | 0.39 | 0.006 |
| Acetyl-CoA | M+8  | 0    | 0     | 0.04 | 0.005 |
| Acetyl-CoA | M+9  | 0    | 0     | 0.02 | 0.006 |
| Acetyl-CoA | M+10 | 0    | 0     | 0    | 0     |
| Acetyl-CoA | M+11 | 0    | 0     | 0    | 0     |
| Acetyl-CoA | M+12 | 0    | 0     | 0    | 0     |
| Acetyl-CoA | M+13 | 0    | 0     | 0    | 0     |
| Acetyl-CoA | M+14 | 0    | 0     | 0    | 0     |
| Acetyl-CoA | M+15 | 0    | 0     | 0    | 0     |
| Acetyl-CoA | M+16 | 0    | 0     | 0    | 0     |
| Acetyl-CoA | M+17 | 0    | 0     | 0    | 0     |
| Acetyl-CoA | M+18 | 0    | 0     | 0    | 0     |
| Acetyl-CoA | M+19 | 0    | 0     | 0    | 0     |
| Acetyl-CoA | M+20 | 0    | 0     | 0    | 0     |
| Acetyl-CoA | M+21 | 0    | 0     | 0    | 0     |
| Acetyl-CoA | M+22 | 0    | 0     | 0    | 0     |
| Acetyl-CoA | M+23 | 0    | 0     | 0    | 0     |
| CoA        | M+0  | 0.76 | 0.01  | 0.11 | 0.002 |
| CoA        | M+1  | 0.07 | 0.008 | 0.01 | 0.002 |
| CoA        | M+2  | 0.06 | 0.005 | 0.02 | 0.003 |
| CoA        | M+3  | 0    | 0.005 | 0.01 | 0.001 |
| CoA        | M+4  | 0    | 0     | 0    | 0.001 |
| CoA        | M+5  | 0.11 | 0.003 | 0.7  | 0.006 |
| CoA        | M+6  | 0    | 0.003 | 0.08 | 0.004 |
| CoA        | M+7  | 0    | 0     | 0.06 | 0.003 |
| CoA        | M+8  | 0    | 0.001 | 0.01 | 0.003 |
| CoA        | M+9  | 0    | 0     | 0    | 0     |
| CoA        | M+10 | 0    | 0     | 0    | 0     |
| CoA        | M+11 | 0    | 0     | 0    | 0     |
| CoA        | M+12 | 0    | 0     | 0    | 0     |
| CoA        | M+13 | 0    | 0     | 0    | 0     |
| CoA        | M+14 | 0    | 0     | 0    | 0     |
| CoA        | M+15 | 0    | 0     | 0    | 0     |
| CoA        | M+16 | 0    | 0     | 0    | 0     |
| CoA        | M+17 | 0    | 0     | 0    | 0     |
| CoA        | M+18 | 0    | 0     | 0    | 0     |
| CoA        | M+19 | 0    | 0     | 0    | 0     |
| CoA        | M+20 | 0    | 0     | 0    | 0     |
| CoA        | M+21 | 0    | 0     | 0    | 0     |

Supplementary Table 6. The fractional labeling of Acetyl-CoA and cytosolic Acetyl-CoA when feeding HeLa cells with [U-13C]-glucose and [U-13C]-glutamine for 24 h.

Notes:

1. Acetyl is derived from measured Acetyl-CoA and CoA (supplementary tables 2-5)

2. Cytosolic Acetyl is derived from measured Palmitic acid (tables 2-5)

| Metabolite           | Mass-isotopomer | Glutamine (HeLa) -<br>derived from<br>measurements | Glutamine (HeLa) -<br>simulated best<br>match | Glucose (HeLa) -<br>derived from<br>measurements | Glucose (HeLa) -<br>simulated best<br>match | Glutamine (HCT116) -<br>derived from<br>measurements | Glutamine (HCT116) -<br>simulated best match | Glucose (HCT116) -<br>derived from<br>measurements | Glucose (HCT116) -<br>simulated best match | Glutamine (A549) -<br>derived from<br>measurements | Glutamine (A549) -<br>simulated best match | Glucose (A549) -<br>derived from<br>measurements | Glucose (A549) -<br>simulated best<br>match | Glutamine (LN229) -<br>derived from<br>measurements | Glutamine (LN229) -<br>simulated best match | Glucose (LN229) -<br>derived from<br>measurements | Glucose (LN229) -<br>simulated best<br>match |
|----------------------|-----------------|----------------------------------------------------|-----------------------------------------------|--------------------------------------------------|---------------------------------------------|------------------------------------------------------|----------------------------------------------|----------------------------------------------------|--------------------------------------------|----------------------------------------------------|--------------------------------------------|--------------------------------------------------|---------------------------------------------|-----------------------------------------------------|---------------------------------------------|---------------------------------------------------|----------------------------------------------|
| Acetyl CoA           | M+0             | 0.7                                                | 0.69                                          | 0.49                                             | 0.34                                        | 0.73                                                 | 0.7                                          | 0.37                                               | 0.34                                       | 0.68                                               | 0.69                                       | 0.36                                             | 0.36                                        | 0.79                                                | 0.68                                        | 0.49                                              | 0.36                                         |
| Acetyl CoA           | M+1             | 0                                                  | 0                                             | 0                                                | 0                                           | 0                                                    | 0.01                                         | 0                                                  | 0.01                                       | 0                                                  | 0                                          | 0                                                | 0                                           | 0                                                   | 0.01                                        | 0                                                 | 0.01                                         |
| Acetyl CoA           | M+2             | 0.3                                                | 0.31                                          | 0.51                                             | 0.66                                        | 0.27                                                 | 0.29                                         | 0.63                                               | 0.66                                       | 0.32                                               | 0.31                                       | 0.64                                             | 0.64                                        | 0.21                                                | 0.32                                        | 0.51                                              | 0.63                                         |
| Acetyl CoA cytosolic | M+0             | 0.69                                               | 0.58                                          | 0.35                                             | 0.45                                        | 0.63                                                 | 0.45                                         | 0.4                                                | 0.57                                       | 0.76                                               | 0.6                                        | 0.33                                             | 0.44                                        | 0.76                                                | 0.53                                        | 0.55                                              | 0.5                                          |
| Acetyl CoA cytosolic | M+1             | 0                                                  | 0                                             | 0                                                | 0                                           | 0                                                    | 0.01                                         | 0                                                  | 0.01                                       | 0                                                  | 0                                          | 0                                                | 0                                           | 0                                                   | 0                                           | 0                                                 | 0                                            |
| Acetyl CoA cytosolic | M+2             | 0.31                                               | 0.42                                          | 0.65                                             | 0.55                                        | 0.37                                                 | 0.55                                         | 0.6                                                | 0.42                                       | 0.24                                               | 0.4                                        | 0.67                                             | 0.56                                        | 0.24                                                | 0.46                                        | 0.45                                              | 0.5                                          |

**Supplementary Table 7. Metabolite measured concentrations and simulated concentrations by CODE-MFA [mM].**

| Metabolite        | Measured concentration - HeLa (Lower bound) | Measured concentration - HeLa (Upper bound) | Simulated best match - HeLa | Measured concentration - HCT116 (Lower bound) | Measured concentration - HCT116 (Upper bound) | Simulated best match - HCT116 | Measured concentration - A549 (Lower bound) | Measured concentration - A549 (Upper bound) | Simulated best match - A549 | Measured concentration - LN229 (Lower bound) | Measured concentration - LN229 (Upper bound) | Simulated best match - LN229 |
|-------------------|---------------------------------------------|---------------------------------------------|-----------------------------|-----------------------------------------------|-----------------------------------------------|-------------------------------|---------------------------------------------|---------------------------------------------|-----------------------------|----------------------------------------------|----------------------------------------------|------------------------------|
| 13BPG             | 0.00067                                     | 0.0033                                      | 0.00082                     | 0.0015                                        | 0.0023                                        | 0.0015                        | 0.0003                                      | 0.0011                                      | 0.00061                     | 0.001                                        | 0.0039                                       | 0.0011                       |
| Acetyl_CoA        | 0.001                                       | 0.005                                       | 0.003                       | 0.00024                                       | 0.0035                                        | 0.0019                        | 0.0072                                      | 0.011                                       | 0.009                       | 0.007                                        | 0.011                                        | 0.0089                       |
| CoA               | 0.0054                                      | 0.0094                                      | 0.0074                      | 0.0011                                        | 0.0017                                        | 0.0014                        | 0.018                                       | 0.027                                       | 0.023                       | 0.017                                        | 0.025                                        | 0.021                        |
| 6phosphogluconate | 0.011                                       | 0.024                                       | 0.011                       | 0.0071                                        | 0.018                                         | 0.0071                        | 0.0016                                      | 0.0065                                      | 0.0046                      | 0.037                                        | 0.12                                         | 0.037                        |
| NADP              | 0.012                                       | 0.028                                       | 0.02                        | 0.0057                                        | 0.017                                         | 0.012                         | 0.11                                        | 0.14                                        | 0.12                        | 0.037                                        | 0.057                                        | 0.047                        |
| GDP               | 0.002                                       | 0.03                                        | 0.016                       | 0.00001                                       | 0.017                                         | 0.0052                        | 0.0074                                      | 0.011                                       | 0.0091                      | 0.015                                        | 0.046                                        | 0.031                        |
| AKG               | 0.022                                       | 0.038                                       | 0.031                       | 0.049                                         | 0.12                                          | 0.083                         | 0.012                                       | 0.021                                       | 0.017                       | 0.013                                        | 0.03                                         | 0.024                        |
| OAA               | 0.04                                        | 0.06                                        | 0.048                       | 0.00001                                       | 0.1                                           | 0.05                          | 0.00001                                     | 0.1                                         | 0.049                       | 0.00001                                      | 0.1                                          | 0.044                        |
| Glc6P             | 0.022                                       | 0.071                                       | 0.03                        | 0.026                                         | 0.18                                          | 0.096                         | 0.0067                                      | 0.019                                       | 0.0077                      | 0.017                                        | 0.15                                         | 0.054                        |
| Fumarate          | 0.033                                       | 0.097                                       | 0.068                       | 0.03                                          | 0.11                                          | 0.1                           | 0.035                                       | 0.056                                       | 0.046                       | 0.12                                         | 0.15                                         | 0.13                         |
| NADH              | 0.073                                       | 0.11                                        | 0.082                       | 0.021                                         | 0.032                                         | 0.026                         | 0.41                                        | 0.61                                        | 0.43                        | 0.024                                        | 0.037                                        | 0.03                         |
| NADPH             | 0.092                                       | 0.14                                        | 0.116                       | 0.0067                                        | 0.015                                         | 0.011                         | 0.31                                        | 0.72                                        | 0.52                        | 0.036                                        | 0.053                                        | 0.045                        |
| Pyruvate          | 0.08                                        | 0.16                                        | 0.112                       | 0.087                                         | 0.15                                          | 0.12                          | 0.084                                       | 0.12                                        | 0.093                       | 0.058                                        | 0.25                                         | 0.16                         |
| 3PG               | 0.13                                        | 0.17                                        | 0.13                        | 0.00001                                       | 0.543                                         | 0.000017                      | 0.082                                       | 0.13                                        | 0.13                        | 0.031                                        | 0.62                                         | 0.067                        |
| PEP               | 0.024                                       | 0.22                                        | 0.03                        | 0.016                                         | 0.038                                         | 0.027                         | 0.016                                       | 0.027                                       | 0.022                       | 0.015                                        | 0.1                                          | 0.057                        |
| Citrate           | 0.15                                        | 0.24                                        | 0.19                        | 0.39                                          | 1.096                                         | 0.74                          | 0.016                                       | 0.26                                        | 0.14                        | 0.12                                         | 0.47                                         | 0.3                          |
| R5P               | 0.21                                        | 0.33                                        | 0.33                        | 0.084                                         | 0.28                                          | 0.11                          | 0.069                                       | 0.15                                        | 0.07                        | 0.29                                         | 0.5                                          | 0.5                          |
| Malate            | 0.27                                        | 0.41                                        | 0.35                        | 0.1                                           | 0.65                                          | 0.26                          | 0.15                                        | 0.31                                        | 0.25                        | 0.28                                         | 0.4                                          | 0.36                         |
| Lactate           | 0.28                                        | 0.44                                        | 0.39                        | 0.29                                          | 0.46                                          | 0.37                          | 0.37                                        | 0.56                                        | 0.51                        | 0.19                                         | 0.7                                          | 0.42                         |
| Alanine           | 0.28                                        | 0.51                                        | 0.4                         | 0.53                                          | 0.58                                          | 0.55                          | 0.025                                       | 0.04                                        | 0.033                       | 0.17                                         | 0.31                                         | 0.24                         |
| ADP               | 0.28                                        | 0.52                                        | 0.4                         | 0.00001                                       | 0.33                                          | 0.23                          | 0.21                                        | 0.31                                        | 0.26                        | 0.26                                         | 1.49                                         | 0.88                         |
| NAD               | 0.4                                         | 0.56                                        | 0.54                        | 0.34                                          | 0.97                                          | 0.66                          | 1.14                                        | 1.52                                        | 1.55                        | 0.91                                         | 1                                            | 0.96                         |
| G3P               | 0.49                                        | 0.65                                        | 0.54                        | 0.22                                          | 0.98                                          | 0.98                          | 0.21                                        | 0.36                                        | 0.32                        | 0.034                                        | 0.68                                         | 0.58                         |
| GTP               | 0.54                                        | 0.7                                         | 0.62                        | 0.00001                                       | 1.43                                          | 0.59                          | 0.34                                        | 0.49                                        | 0.42                        | 0.00001                                      | 4.04                                         | 1.9                          |
| Aspartate         | 1.11                                        | 1.75                                        | 1.48                        | 0.65                                          | 0.83                                          | 0.74                          | 0.85                                        | 1.2                                         | 1.05                        | 5.59                                         | 7.73                                         | 7.37                         |
| ATP               | 0.89                                        | 3.97                                        | 2.43                        | 1.77                                          | 4.93                                          | 2.33                          | 0.53                                        | 1.35                                        | 0.94                        | 1.23                                         | 7.98                                         | 4.61                         |
| Orthophosphate    | 5.43                                        | 6.23                                        | 5.83                        | 0.00001                                       | 11.66                                         | 5.83                          | 0.00001                                     | 11.66                                       | 5.83                        | 0.00001                                      | 11.66                                        | 5.83                         |
| Glutamate         | 9.4                                         | 14.6                                        | 10.19                       | 9.23                                          | 13.43                                         | 11.37                         | 9.15                                        | 13.09                                       | 10.048                      | 16.88                                        | 22.82                                        | 10.83                        |
| Glutathione       | 8.53                                        | 15.27                                       | 11.9                        | 11.2                                          | 17.32                                         | 14.26                         | 8.28                                        | 13.54                                       | 10.91                       | 9.03                                         | 13.1                                         | 11.07                        |
| Glutamine         | 11.64                                       | 15.56                                       | 13.6                        | 39.43                                         | 54.87                                         | 47.15                         | 2.22                                        | 3.27                                        | 2.74                        | 8.46                                         | 12.29                                        | 10.37                        |

Supplementary Table 8. Metabolite concentrations derived by CODE-MFA [mM].

| met name             | Simulated concentration - HeLa (Lower bound) | Simulated concentration - HeLa (Upper bound) | Simulated best match - HeLa | Simulated concentration - HCT116 (Lower bound) | Simulated concentration - HCT116 (Upper bound) | Simulated best match - HCT116 | Simulated concentration - A549 (Lower bound) | Simulated concentration - A549 (Upper bound) | Simulated best match - A549 | Simulated concentration - LN229 (Lower bound) | Simulated concentration - LN229 (Upper bound) | Simulated best match - LN229 |
|----------------------|----------------------------------------------|----------------------------------------------|-----------------------------|------------------------------------------------|------------------------------------------------|-------------------------------|----------------------------------------------|----------------------------------------------|-----------------------------|-----------------------------------------------|-----------------------------------------------|------------------------------|
| Glutamine_CY         | 0.0021                                       | 19.45                                        | 16.98                       | 18.27                                          | 50                                             | 50                            | 0.0009                                       | 4.08                                         | 0.0025                      | 0.0031                                        | 15.36                                         | 0.47                         |
| Glutamine_MT         | 0.0016                                       | 50                                           | 0.088                       | 0.0017                                         | 50                                             | 37.06                         | 0.00023                                      | 16.32                                        | 13.7                        | 0.00083                                       | 50                                            | 50                           |
| ADP_MT               | 0.000035                                     | 2.11                                         | 0.28                        | 0.00001                                        | 0.24                                           | 0.000029                      | 0.00002                                      | 1.57                                         | 0.058                       | 0.000035                                      | 5.76                                          | 2.12                         |
| ADP_CY               | 0.158                                        | 0.65                                         | 0.43                        | 0.11                                           | 0.42                                           | 0.29                          | 0.015                                        | 0.39                                         | 0.31                        | 0.21                                          | 1.53                                          | 0.56                         |
| Orthophosphate_CY    | 0.0019                                       | 7.79                                         | 2.08                        | 0.0021                                         | 14.57                                          | 0.0057                        | 0.0015                                       | 12.16                                        | 1.64                        | 0.03                                          | 12.2                                          | 4.49                         |
| Orthophosphate_MT    | 0.00035                                      | 31.15                                        | 20.83                       | 0.00049                                        | 50                                             | 29.13                         | 0.00038                                      | 50                                           | 22.57                       | 0.00051                                       | 50                                            | 11.2                         |
| Glutamate_CY         | 0.086                                        | 0.63                                         | 0.23                        | 5.21                                           | 16.78                                          | 14.18                         | 0.003                                        | 0.16                                         | 0.06                        | 0.14                                          | 2.83                                          | 1.04                         |
| ATP_MT               | 0.000016                                     | 3.9                                          | 0.35                        | 0.00001                                        | 0.35                                           | 0.000044                      | 0.00001                                      | 2.36                                         | 0.029                       | 0.000017                                      | 7.78                                          | 2.86                         |
| ATP_CY               | 1.085                                        | 4.96                                         | 2.95                        | 1.073                                          | 4.19                                           | 2.92                          | 0.16                                         | 1.69                                         | 1.17                        | 1.85                                          | 9.97                                          | 5                            |
| NH3_MT               | 0.00001                                      | 50                                           | 50                          | 0.00001                                        | 50                                             | 0.0005                        | 0.00001                                      | 50                                           | 0.000018                    | 0.00001                                       | 50                                            | 0.018                        |
| Glutamate_MT         | 18.39                                        | 50                                           | 50                          | 0.0067                                         | 7.31                                           | 0.13                          | 18.4                                         | 50                                           | 50                          | 18.4                                          | 50                                            | 50                           |
| NAD_MT               | 0.53                                         | 2.8                                          | 1.44                        | 0.052                                          | 4.84                                           | 2.85                          | 1.37                                         | 7.58                                         | 3.72                        | 0.071                                         | 5                                             | 3.87                         |
| NADH_MT              | 0.151                                        | 0.56                                         | 0.41                        | 0.048                                          | 0.16                                           | 0.13                          | 0.8                                          | 3.05                                         | 2.17                        | 0.056                                         | 0.18                                          | 0.15                         |
| NADP_MT              | 0.00001                                      | 0.000027                                     | 0.00001                     | 0.00001                                        | 0.0015                                         | 0.00001                       | 0.00001                                      | 0.0023                                       | 0.000015                    | 0.00001                                       | 0.011                                         | 0.00001                      |
| NADPH_MT             | 0.213                                        | 0.7                                          | 0.58                        | 0.02                                           | 0.076                                          | 0.053                         | 0.94                                         | 3.58                                         | 2.55                        | 0.081                                         | 0.27                                          | 0.22                         |
| NAD_CY               | 0.118                                        | 0.7                                          | 0.32                        | 0.04                                           | 1.21                                           | 0.11                          | 0.37                                         | 1.89                                         | 1.01                        | 0.031                                         | 1.25                                          | 0.23                         |
| NADH_CY              | 0.000015                                     | 0.00011                                      | 0.000041                    | 0.00001                                        | 0.00026                                        | 0.000013                      | 0.00008                                      | 0.0006                                       | 0.00022                     | 0.00001                                       | 0.00031                                       | 0.000015                     |
| NADP_CY              | 0.0092                                       | 0.035                                        | 0.025                       | 0.0053                                         | 0.022                                          | 0.014                         | 0.056                                        | 0.17                                         | 0.15                        | 0.022                                         | 0.072                                         | 0.059                        |
| NADPH_CY             | 0.0003                                       | 0.006                                        | 0.0008                      | 0.000063                                       | 0.0034                                         | 0.00047                       | 0.00028                                      | 0.015                                        | 0.0056                      | 0.000041                                      | 0.016                                         | 0.00082                      |
| Acetyl_CoA_MT        | 0.00008                                      | 0.012                                        | 0.0043                      | 0.000035                                       | 0.014                                          | 0.0052                        | 0.00008                                      | 0.032                                        | 0.012                       | 0.00004                                       | 0.044                                         | 0.016                        |
| OAA_MT               | 0.00001                                      | 0.000027                                     | 0.00001                     | 0.00001                                        | 0.0014                                         | 0.00007                       | 0.00001                                      | 0.000027                                     | 0.00001                     | 0.00001                                       | 0.00068                                       | 0.000012                     |
| Citrate_MT           | 0.355                                        | 1.18                                         | 0.96                        | 1.36                                           | 5.48                                           | 3.69                          | 0.25                                         | 1.3                                          | 0.69                        | 0.54                                          | 2.37                                          | 1.48                         |
| CoA_MT               | 0.00001                                      | 0.047                                        | 0.0088                      | 0.00001                                        | 0.0085                                         | 0.00001                       | 0.00001                                      | 0.14                                         | 0.02                        | 0.00001                                       | 0.12                                          | 0.0063                       |
| CoA_CY               | 0.0009                                       | 0.012                                        | 0.007                       | 0.00001                                        | 0.0021                                         | 0.0018                        | 0.0032                                       | 0.034                                        | 0.023                       | 0.00001                                       | 0.031                                         | 0.024                        |
| Fumarate_MT          | 0.036                                        | 0.26                                         | 0.097                       | 0.008                                          | 0.56                                           | 0.44                          | 0.074                                        | 0.28                                         | 0.2                         | 0.14                                          | 0.76                                          | 0.38                         |
| Malate_MT            | 0.094                                        | 0.69                                         | 0.25                        | 0.021                                          | 1.45                                           | 1.15                          | 0.19                                         | 0.73                                         | 0.52                        | 0.016                                         | 2                                             | 0.044                        |
| Pyruvate_MT          | 0.00001                                      | 0.00038                                      | 0.000019                    | 0.0002                                         | 0.04                                           | 0.03                          | 0.00001                                      | 0.031                                        | 0.023                       | 0.00001                                       | 0.003                                         | 0.00002                      |
| PEP_MT               | 0.00034                                      | 0.0069                                       | 0.0025                      | 0.00001                                        | 0.19                                           | 0.004                         | 0.00001                                      | 0.0015                                       | 0.00001                     | 0.00001                                       | 0.0015                                        | 0.00001                      |
| GDP_MT               | 0.00057                                      | 0.084                                        | 0.031                       | 0.00001                                        | 0.068                                          | 0.025                         | 0.00001                                      | 0.053                                        | 0.041                       | 0.00001                                       | 0.23                                          | 0.14                         |
| GTP_MT               | 0.174                                        | 3.48                                         | 1.29                        | 0.00003                                        | 4.7                                            | 0.23                          | 0.000016                                     | 2.45                                         | 0.0066                      | 0.00012                                       | 20.1                                          | 0.018                        |
| GDP_CY               | 0.00001                                      | 0.033                                        | 0.012                       | 0.00001                                        | 0.022                                          | 0.00016                       | 0.00001                                      | 0.013                                        | 0.0012                      | 0.00001                                       | 0.054                                         | 0.00027                      |
| GTP_CY               | 0.00015                                      | 0.87                                         | 0.45                        | 0.000084                                       | 1.78                                           | 0.68                          | 0.19                                         | 0.61                                         | 0.52                        | 0.0003                                        | 5                                             | 2.37                         |
| PEP_CY               | 0.013                                        | 0.1                                          | 0.037                       | 0.000011                                       | 0.047                                          | 0.032                         | 0.01                                         | 0.034                                        | 0.027                       | 0.026                                         | 0.12                                          | 0.071                        |
| Pyruvate_CY          | 0.051                                        | 0.2                                          | 0.14                        | 0.052                                          | 0.19                                           | 0.14                          | 0.041                                        | 0.15                                         | 0.11                        | 0.073                                         | 0.31                                          | 0.2                          |
| AKG_MT               | 0.00013                                      | 0.0027                                       | 0.00037                     | 0.00021                                        | 0.084                                          | 0.00056                       | 0.000014                                     | 0.002                                        | 0.00074                     | 0.00024                                       | 0.1                                           | 0.00066                      |
| Aspartate_MT         | 0.19                                         | 1.4                                          | 0.52                        | 0.000027                                       | 1.59                                           | 0.00053                       | 0.43                                         | 6.02                                         | 1.18                        | 0.22                                          | 33.3                                          | 0.61                         |
| Aspartate_CY         | 0.63                                         | 2.19                                         | 1.72                        | 0.12                                           | 1.04                                           | 0.93                          | 0.14                                         | 1.51                                         | 1.02                        | 3.33                                          | 9.66                                          | 9                            |
| OAA_CY               | 0.022                                        | 0.075                                        | 0.06                        | 0.023                                          | 0.12                                           | 0.062                         | 0.022                                        | 0.12                                         | 0.061                       | 0.02                                          | 0.12                                          | 0.054                        |
| Citrate_CY           | 0.000039                                     | 0.00079                                      | 0.0003                      | 0.00014                                        | 0.02                                           | 0.00037                       | 0.00002                                      | 0.0011                                       | 0.0004                      | 0.000045                                      | 0.0067                                        | 0.00033                      |
| AKG_CY               | 0.014                                        | 0.047                                        | 0.039                       | 0.038                                          | 0.14                                           | 0.1                           | 0.0078                                       | 0.026                                        | 0.021                       | 0.011                                         | 0.037                                         | 0.03                         |
| Malate_CY            | 0.136                                        | 0.51                                         | 0.37                        | 0.0058                                         | 0.38                                           | 0.043                         | 0.065                                        | 0.39                                         | 0.18                        | 0.06                                          | 0.51                                          | 0.44                         |
| Fumarate_CY          | 0.022                                        | 0.084                                        | 0.061                       | 0.0021                                         | 0.14                                           | 0.016                         | 0.00001                                      | 0.057                                        | 0.0077                      | 0.000024                                      | 0.19                                          | 0.072                        |
| Acetyl_CoA_CY        | 0.00036                                      | 0.0062                                       | 0.0027                      | 0.00001                                        | 0.0028                                         | 0.001                         | 0.0031                                       | 0.014                                        | 0.0084                      | 0.0026                                        | 0.013                                         | 0.0071                       |
| Glutathione_MT       | 0.0004                                       | 50                                           | 0.022                       | 0.00073                                        | 50                                             | 16                            | 0.00083                                      | 50                                           | 50                          | 0.00096                                       | 50                                            | 0.0026                       |
| Glutathione_CY       | 2.012                                        | 19.1                                         | 14.87                       | 0.69                                           | 21.65                                          | 13.8                          | 0.0028                                       | 16.9                                         | 1.14                        | 0.0017                                        | 16.38                                         | 13.8                         |
| Lactate_CY           | 0.18                                         | 0.55                                         | 0.48                        | 0.17                                           | 0.58                                           | 0.47                          | 0.23                                         | 0.7                                          | 0.64                        | 0.2                                           | 0.87                                          | 0.53                         |
| Alanine_CY           | 0.000074                                     | 0.6                                          | 0.0002                      | 0.00017                                        | 0.72                                           | 0.5                           | 0.00001                                      | 0.05                                         | 0.029                       | 0.000044                                      | 0.35                                          | 0.00012                      |
| Alanine_MT           | 0.272                                        | 2.57                                         | 2                           | 0.28                                           | 2.9                                            | 0.76                          | 0.017                                        | 0.2                                          | 0.045                       | 0.16                                          | 1.54                                          | 1.19                         |
| Glc6P_CY             | 0.022                                        | 0.07                                         | 0.03                        | 0.026                                          | 0.18                                           | 0.1                           | 0.0066                                       | 0.019                                        | 0.0077                      | 0.017                                         | 0.15                                          | 0.054                        |
| R5P_CY               | 0.21                                         | 0.33                                         | 0.33                        | 0.083                                          | 0.28                                           | 0.11                          | 0.069                                        | 0.15                                         | 0.07                        | 0.29                                          | 0.5                                           | 0.5                          |
| CarAsp_CY            | 0.00001                                      | 50                                           | 0.00023                     | 0.00001                                        | 50                                             | 0.000023                      | 0.00001                                      | 50                                           | 0.0067                      | 0.00001                                       | 50                                            | 0.018                        |
| Asparagine_CY        | 0.00001                                      | 50                                           | 0.0021                      | 0.00001                                        | 50                                             | 0.12                          | 0.00001                                      | 50                                           | 0.00026                     | 0.00001                                       | 50                                            | 0.00045                      |
| 3PG_CY               | 0.13                                         | 0.17                                         | 0.13                        | 0.00001                                        | 0.36                                           | 0.000016                      | 0.082                                        | 0.13                                         | 0.13                        | 0.031                                         | 0.62                                          | 0.067                        |
| 13BPG_CY             | 0.00068                                      | 0.0033                                       | 0.00082                     | 0.0014                                         | 0.0023                                         | 0.0014                        | 0.0003                                       | 0.0011                                       | 0.00061                     | 0.001                                         | 0.0039                                        | 0.0011                       |
| G3P_CY               | 0.49                                         | 0.65                                         | 0.54                        | 0.22                                           | 0.98                                           | 0.98                          | 0.21                                         | 0.36                                         | 0.32                        | 0.034                                         | 0.68                                          | 0.58                         |
| 6phosphogluconate_CY | 0.011                                        | 0.024                                        | 0.011                       | 0.0071                                         | 0.018                                          | 0.0071                        | 0.0016                                       | 0.0065                                       | 0.0046                      | 0.037                                         | 0.12                                          | 0.037                        |



**Supplementary Table 9. Uptake/secretion rate measurements [mM/h]**

| Reaction # | Reaction description            | Measured flux - HeLa (lb) | Measured flux - HeLa (ub) | Measured flux - HCT116 (lb) | Measured flux - HCT116 (ub) | Measured flux - A549 (lb) | Measured flux - A549 (ub) | Measured flux - LN229 (lb) | Measured flux - LN229 (ub) |
|------------|---------------------------------|---------------------------|---------------------------|-----------------------------|-----------------------------|---------------------------|---------------------------|----------------------------|----------------------------|
| v1         | Glutamine_Media => Glutamine_CY | 81                        | 82                        | 56                          | 58                          | 53                        | 54.6                      | 36                         | 38                         |
| v2         | Glutamate_CY => Glutamate_Media | 0.1                       | 70                        | 0.1                         | 24.8                        | 0.1                       | 15.6                      | 0.1                        | 19.7                       |
| v3         | Glucose_Media => Glc6P_CY       | 111                       | 355                       | 214                         | 272                         | 188                       | 232                       | 133                        | 294                        |
| v4         | Lactate_CY => Lactate_Media     | 506                       | 643                       | 476                         | 612                         | 398                       | 481                       | 414                        | 465                        |
| v5         | Pyruvate_CY => Pyruvate_Media   | 3.5                       | 4.8                       | 26                          | 31                          | 13.5                      | 17.8                      | 20.5                       | 25.4                       |

Supplementary Table 10. Net fluxes derived by CoDe-MFA (mM/h)

| Reaction # | Reaction description                                                                | Flux by CODE-MFA - HeLa (lb) | Flux by CODE-MFA - HeLa (ub) | Flux by CODE-MFA - HeLa (best fit) | Flux by CODE-MFA - HCT116 (lb) | Flux by CODE-MFA - HCT116 (ub) | Flux by CODE-MFA - HCT116 (best fit) | Flux by CODE-MFA - A549 (lb) | Flux by CODE-MFA - A549 (ub) | Flux by CODE-MFA - A549 (best fit) | Flux by CODE-MFA - LN229 (lb) | Flux by CODE-MFA - LN229 (ub) | Flux by CODE-MFA - LN229 (best fit) |
|------------|-------------------------------------------------------------------------------------|------------------------------|------------------------------|------------------------------------|--------------------------------|--------------------------------|--------------------------------------|------------------------------|------------------------------|------------------------------------|-------------------------------|-------------------------------|-------------------------------------|
| v1         | Glutamine_Media => Glutamine_Cy                                                     | 81                           | 82                           | 82                                 | 56                             | 58                             | 58                                   | 58                           | 53                           | 54.6                               | 54.6                          | 36                            | 38                                  |
| v2         | Glutamate_Cy => Glutamate_Media                                                     | 53.79                        | 70                           | 63.03                              | 4.92                           | 24.14                          | 14.92                                | 13.6                         | 15.6                         | 15.6                               | 15.6                          | 0.79                          | 10.79                               |
| v3         | Glucose_Media => Glc6P_Cy                                                           | 256.02                       | 263.27                       | 257.27                             | 231                            | 272                            | 272                                  | 199                          | 232                          | 232                                | 206.31                        | 246.31                        | 239.31                              |
| v4         | Lactate_Cy => Lactate_Media                                                         | 506                          | 516.5                        | 506                                | 495.11                         | 584.15                         | 565.15                               | 407.09                       | 481                          | 477.09                             | 477.09                        | 414                           | 465                                 |
| v5         | Pyruvate_Cy => Pyruvate_Media                                                       | 3.5                          | 4.8                          | 4.8                                | 26                             | 31                             | 26                                   | 13.5                         | 17.8                         | 17.8                               | 17.8                          | 20.5                          | 25.4                                |
| v13        | Aspartate_Cy => Fumarate_Cy                                                         | 2                            | 4                            | 2.97                               | 2                              | 4                              | 2                                    | 2                            | 4                            | 4                                  | 4                             | 4                             | 2                                   |
| v16        | R5P_Cy => R5P_Cy_Pool                                                               | 2                            | 4                            | 2                                  | 2                              | 4                              | 2                                    | 2                            | 4                            | 4                                  | 4                             | 2                             | 2                                   |
| v17        | Acetyl_CoA_Cy => Fatty Acid                                                         | 1.19                         | 5.19                         | 2.69                               | 5                              | 10                             | 5                                    | 10                           | 6.5                          | 10                                 | 10                            | 0.13                          | 3.63                                |
| v18        | CarAto_Cy => Pyrimidines                                                            | 2                            | 4                            | 2                                  | 2                              | 4                              | 2                                    | 4                            | 4                            | 4                                  | 4                             | 2                             | 4                                   |
| v19        | Asparagine_Cy => Asparagine_Cy_Pool                                                 | 1                            | 3                            | 1                                  | 1                              | 3                              | 1                                    | 2                            | 3                            | 3                                  | 3                             | 1                             | 3                                   |
| v21        | Proline_MT => Proline_MT_Pool                                                       | 1                            | 3                            | 1                                  | 1                              | 3                              | 1                                    | 3                            | 1                            | 3                                  | 3                             | 1                             | 3                                   |
| v51        | Glutamine_Cy => Glutamine_MT                                                        | 38                           | 82                           | 79                                 | 22.01                          | 58                             | 55.01                                | 0                            | 54.6                         | 38.6                               | 0                             | 38                            | 4.72                                |
| v52.1      | Glutamate_Cy => Glutamate_MT                                                        | 0                            | 25                           | 0                                  | -55.67                         | 0                              | -14.67                               | -202.35                      | 0                            | 100.4                              | -42.27                        | -90                           | 0                                   |
| v53.1      | AKG_Cy + Malate_MT => AKG_MT + Malate_Cy                                            | 0.9                          | 14.4                         | 4.4                                | 0                              | 18.41                          | 4.41                                 | 10.63                        | 74.63                        | 24.63                              | -3.5                          | 100                           | 0                                   |
| v53.2      | AKG_MT + Glutathione_Cy => AKG_Cy + Glutathione_MT                                  | 52.29                        | 100.61                       | 75.61                              | 0                              | 38.56                          | 13.56                                | -140                         | 90                           | 0                                  | -88.75                        | 111.25                        | 11.25                               |
| v55        | Fumarate_MT => Fumarate_Cy                                                          | -14                          | -2                           | -2.97                              | -4                             | 29.48                          | 17.48                                | -55.66                       | -2                           | -14.66                             | -96.21                        | -2.21                         | -16.21                              |
| v56.1      | Malate_MT + Citrate_Cy => Malate_Cy + Citrate_MT                                    | -4.36                        | 0                            | -1.36                              | -9.56                          | -0.87                          | -5.87                                | -12.01                       | -7.51                        | -11.01                             | -8.29                         | -0.29                         | -5.29                               |
| v57        | Aspartate_MT => Glutamate_Cy => Aspartate_Cy + Glutamate_MT                         | 3.35                         | 17.82                        | 7.82                               | 3.96                           | 11.96                          | 4.96                                 | 9.07                         | 22.57                        | 19.07                              | 19.07                         | 47.67                         | 38.67                               |
| v58        | Alanine_MT => Alanine_Cy                                                            | 0                            | 3                            | 0.36                               | 1.1                            | 7.49                           | 2.49                                 | 3.5                          | 10                           | 6.57                               | 4.3                           | 10.8                          | 4.8                                 |
| v59        | Pyruvate_MT => Pyruvate_Cy                                                          | -9.84                        | -3.84                        | -6.34                              | -16.74                         | -8.24                          | -11.74                               | -20.45                       | -12.45                       | -18.45                             | -14.93                        | -8.93                         | -9.93                               |
| v60        | PEP_Cy + Citrate_MT => PEP_MT + Citrate_Cy                                          | 0                            | 2.98                         | 0.98                               | 0                              | 1.19                           | 0.19                                 | 0.02                         | 1.52                         | 0                                  | 1.02                          | 0                             | 1.28                                |
| v101       | Glutamine_Cy => Glutamine_Cy_Pool                                                   | 0                            | 3                            | 0                                  | 0                              | 3                              | 0                                    | 0                            | 3                            | 0                                  | 0                             | 3                             | 0                                   |
| v102       | Glutamine_Cy => Glutamine_Cy                                                        | 0                            | 0                            | 0                                  | 0                              | 33                             | 0                                    | 41                           | 0                            | 53.6                               | 0                             | 37                            | 33.28                               |
| v105       | Glutamate_Cy => Glutamate_Cy_Pool                                                   | 0                            | 3                            | 0                                  | 0                              | 3                              | 0                                    | 0                            | 3                            | 0                                  | 3                             | 0                             | 3                                   |
| v106.1     | Glutamate_Cy => AKG_Cy                                                              | -88                          | -50                          | -69                                | -24.25                         | 26.35                          | -5.25                                | -70.25                       | 169.75                       | 29.75                              | -69.51                        | 100.49                        | 10.49                               |
| v107       | Citrate_Cy + NADP_Cy => AKG_Cy + NADPH_Cy + CO2                                     | -1.36                        | 0                            | -0.36                              | -7.94                          | -0.44                          | -3.94                                | 1.03                         | 3.53                         | 2.03                               | 0                             | 6.43                          | 4.93                                |
| v108       | Citrate_Cy + ATP_Cy + CoA_Cy => Acetyl_CoA_Cy + OAA_Cy + ADP_Cy + Orthophosphate_Cy | 1.19                         | 5.19                         | 2.69                               | 5                              | 10                             | 5                                    | 10                           | 6.5                          | 10                                 | 10                            | 0.13                          | 3.63                                |
| v109       | Fumarate_Cy => Malate_Cy                                                            | -10                          | 0                            | 0                                  | -10                            | 9.74                           | 0                                    | -30.33                       | 0                            | -5.33                              | 0                             | -0.1                          | -7.1                                |
| v111       | Malate_Cy + NAD_Cy => OAA_Cy + NADH_Cy                                              | -8.54                        | -2.04                        | -4.54                              | -10                            | -3.96                          | -9.96                                | -18.59                       | -10.16                       | -17.16                             | -14.8                         | -13.8                         | -27.8                               |
| v112       | Malate_Cy + NADP_Cy => Pyruvate_Cy + CO2 + NADPH_Cy                                 | 2.59                         | 10.09                        | 7.59                               | 24.97                          | 33.97                          | 27.97                                | 18.61                        | 23.11                        | 0                                  | 18.31                         | 0                             | 8.31                                |
| v113       | OAA_Cy + Glutamate_Cy => Aspartate_Cy + AKG_Cy                                      | -5.35                        | -0.35                        | -1.85                              | 0                              | 1.04                           | 0.04                                 | -8.66                        | -0.16                        | -7.16                              | -33.67                        | -13.67                        | -26.67                              |
| v114       | Aspartate_Cy + CO2 => CarAsp_Cy                                                     | 2                            | 4                            | 2                                  | 2                              | 4                              | 2                                    | 4                            | 4                            | 4                                  | 4                             | 2                             | 4                                   |
| v115       | Aspartate_Cy => Asparagine_Cy                                                       | 1                            | 3                            | 1                                  | 1                              | 3                              | 1                                    | 3                            | 1                            | 3                                  | 1                             | 3                             | 3                                   |
| v116       | Aspartate_Cy => Aspartate_Cy_Pool                                                   | 0                            | 3                            | 0                                  | 0                              | 3                              | 0                                    | 0                            | 3                            | 0.92                               | 0                             | 3                             | 3                                   |
| v117       | Alanine_Cy => Alanine_Cy_Pool                                                       | 0                            | 3                            | 0.36                               | 0                              | 3                              | 0                                    | 1                            | 0                            | 3                                  | 0                             | 3                             | 0                                   |
| v118       | Pyruvate_Cy + NADH_Cy => Lactate_Cy + NAD_Cy                                        | 506                          | 516.5                        | 506                                | 495.11                         | 584.15                         | 565.15                               | 407.09                       | 481                          | 477.09                             | 477.09                        | 414                           | 465                                 |
| v119       | PEP_Cy + ADP_Cy => Pyruvate_Cy + ATP_Cy                                             | 506.56                       | 518.54                       | 509.56                             | 504.92                         | 593.92                         | 574.92                               | 423.23                       | 493.23                       | 493.23                             | 426.52                        | 499.02                        | 492.02                              |
| v120       | 3PG_Cy => PEP_Cy                                                                    | 508.04                       | 518.54                       | 510.54                             | 505.11                         | 594.11                         | 575.11                               | 423.24                       | 499.24                       | 499.24                             | 427.8                         | 499.8                         | 492.8                               |
| v121       | 13BPG_Cy + ADP_Cy => 3PG_Cy + ATP_Cy                                                | 508.04                       | 518.54                       | 510.54                             | 505.11                         | 594.11                         | 575.11                               | 423.24                       | 499.24                       | 499.24                             | 427.8                         | 499.8                         | 492.8                               |
| v122       | G3P_Cy + NAD_Cy + Orthophosphate_Cy => 13BPG_Cy + NADH_Cy                           | 508.04                       | 518.54                       | 510.54                             | 505.11                         | 594.11                         | 575.11                               | 423.24                       | 499.24                       | 499.24                             | 427.8                         | 499.8                         | 492.8                               |
| v123       | G16P_Cy => G3P_Cy + G3P_Cy                                                          | 254.02                       | 259.27                       | 255.27                             | 252.55                         | 297.05                         | 287.55                               | 211.62                       | 249.62                       | 247.12                             | 213.9                         | 249.9                         | 246.4                               |
| v124       | G16P_Cy + NADP_Cy => 6phosphogluconate_Cy + NADPH_Cy                                | 2                            | 4                            | 2                                  | 2                              | 4                              | 2                                    | 4                            | 2                            | 4                                  | 2                             | 4                             | 2                                   |
| v125       | 6phosphogluconate_Cy + NADP_Cy => R5P_Cy + NADPH_Cy + CO2                           | 2                            | 4                            | 2                                  | 2                              | 4                              | 2                                    | 4                            | 2                            | 4                                  | 2                             | 4                             | 2                                   |
| v201       | Glutamine_MT => Glutamine_MT_Pool                                                   | 0                            | 3                            | 0                                  | 0                              | 3                              | 0                                    | 0.01                         | 3                            | 0                                  | 3                             | 0                             | 3                                   |
| v202       | Glutamine_MT => Glutamate_MT + NH3                                                  | 38                           | 81                           | 79                                 | 22                             | 57                             | 55                                   | 0                            | 53.6                         | 35.6                               | 0                             | 37                            | 1.72                                |
| v203       | Glutamate_MT => Proline_MT                                                          | 1                            | 3                            | 0                                  | 3                              | 3                              | 0                                    | 3                            | 1                            | 3                                  | 3                             | 1                             | 3                                   |
| v204       | Glutamate_MT => Glutamate_MT_Pool                                                   | 0                            | 3                            | 0                                  | 0                              | 3                              | 0                                    | 3                            | 0                            | 3                                  | 0                             | 3                             | 0                                   |
| v205.1     | Glutamate_MT => AKG_MT                                                              | 44.99                        | 93.32                        | 69.99                              | -2.16                          | 49.84                          | 30.84                                | -163.75                      | 86.22                        | -23.32                             | -109.3                        | 80.42                         | -9.58                               |
| v206       | AKG_MT + CO2 + NADPH_MT => Citrate_MT + NADP_MT                                     | 0.12                         | 1.12                         | 0.62                               | -7.98                          | -0.48                          | -5.48                                | 0.74                         | 3.24                         | 2.24                               | 0.26                          | 1.76                          | 0.76                                |
| v207       | AKG_MT + CO2 + NADH_MT => Citrate_MT + NAD_MT                                       | -1.98                        | -0.98                        | -1.0                               | -10                            | 0                              | 0                                    | -1.5                         | 0                            | 0                                  | -6                            | 0                             | 0                                   |
| v208       | Acetyl_CoA_MT + OAA_MT => Citrate_MT + CoA_MT                                       | 2.2                          | 6.2                          | 3.7                                | 8.04                           | 15.54                          | 11.54                                | 6.79                         | 10.79                        | 9.79                               | 4.31                          | 7.81                          | 5.31                                |
| v209       | AKG_MT => CO2 + Fumarate_MT                                                         | 6.98                         | 20.98                        | 10.98                              | 29.62                          | 45.62                          | 35.62                                | 29.79                        | 31.79                        | 29.79                              | 12.38                         | 32.38                         | 22.38                               |
| v210       | Fumarate_MT => Malate_MT                                                            | 10.95                        | 25.95                        | 6.97                               | 4.07                           | 28.07                          | 9.07                                 | 15.32                        | 47.22                        | 22.22                              | 9.29                          | 69.29                         | 19.29                               |
| v212       | Malate_MT + NAD_MT => OAA_MT + NADH_MT                                              | 7.9                          | 20.9                         | 10.9                               | 13.81                          | 27.31                          | 17.31                                | 19.93                        | 31.93                        | 29.93                              | 24.19                         | 53.19                         | 43.19                               |
| v213.1     | Malate_MT + NAD_MT => Pyruvate_MT + CO2 + NADH_MT                                   | 0                            | 0.2                          | 0                                  | 0.29                           | 3.29                           | 0                                    | 2.29                         | 0                            | 2.41                               | 0.91                          | 1.18                          | 0.68                                |
| v213.2     | Malate_MT + NADP_MT => Pyruvate_MT + CO2 + NADPH_MT                                 | -0.5                         | 0                            | 0                                  | 0                              | 0                              | 0                                    | -1                           | 0                            | -1                                 | 0                             | 0                             | 0                                   |
| v214       | Aspartate_MT + AKG_MT => OAA_MT + Glutamate_MT                                      | -18.81                       | -6.35                        | -8.81                              | -14                            | -4.96                          | -5.96                                | -22.66                       | -11.16                       | -11.16                             | -47.67                        | -19.67                        | -38.67                              |
| v215       | Aspartate_MT => Aspartate_MT_Pool                                                   | 0                            | 3                            | 1                                  | 0                              | 3                              | 1                                    | 0                            | 3                            | 2.08                               | 0                             | 3                             | 0                                   |
| v216       | Alanine_MT => Alanine_MT_Pool                                                       | 0                            | 3                            | 2.15                               | 0                              | 3                              | 0                                    | 0                            | 3                            | 3                                  | 0                             | 3                             | 1                                   |
| v217       | Pyruvate_MT + Glutamate_MT => Alanine_MT + AKG_MT                                   | 0.51                         | 3                            | 2.01                               | 2.1                            | 7.49                           | 2.49                                 | 4.5                          | 10                           | 9.56                               | 5.3                           | 10.3                          | 5.3                                 |
| v218       | PEP_MT + CO2 + GDP_MT => OAA_MT + GTP_MT                                            | 0                            | 2.98                         | 0.98                               | 0                              | 1.19                           | 0                                    | 0.02                         | 1.52                         | 1.02                               | 0                             | 1.28                          | 0.78                                |
| v219       | Pyruvate_MT + NAD_MT + CoA_MT => CO2 + Acetyl_CoA_MT + NADH_MT                      | 2.2                          | 6.2                          | 3.7                                | 8.04                           | 15.54                          | 11.54                                | 6.79                         | 10.79                        | 9.79                               | 4.31                          | 7.81                          | 5.31                                |
| v220       | Pyruvate_MT + CO2 + ATP_MT => OAA_MT + Orthophosphate_MT + ADP_MT                   | 0                            | 1.63                         | 0.63                               | 0                              | 1                              | 0                                    | 0                            | 1                            | 0                                  | 0                             | 1                             | 0                                   |

Supplementary Table 11. Thermodynamic calculations for mitochondrial transporters

| Constants                                 | Value | Units  |
|-------------------------------------------|-------|--------|
| R                                         | 2.478 |        |
| F Faraday constant                        | 96.49 | kC/mol |
| Mitochondrial PH level                    | 7.5   | pH     |
| Cytosolic PH level                        | 7     | pH     |
| $\Delta$ Mitochondrial membrane potential | 0.15  | V      |

| Mitochondrial transport                                                                                                                                                                                                                                                                                                                                             |                       |
|---------------------------------------------------------------------------------------------------------------------------------------------------------------------------------------------------------------------------------------------------------------------------------------------------------------------------------------------------------------------|-----------------------|
| $\text{Ata}(m) + \text{Glutathione}(c) \leftrightarrow \text{Ata}(c) + \text{Glutathione}(m)$                                                                                                                                                                                                                                                                       |                       |
| $\text{Ata}(m) \leftrightarrow \text{Ata}(c)$                                                                                                                                                                                                                                                                                                                       |                       |
| Standard Gibbs free energy formula                                                                                                                                                                                                                                                                                                                                  |                       |
| $\text{G}(\text{Ata}(c)) - \text{G}(\text{Ata}(m)) + \text{G}(\text{Glu}(m)) - \text{G}(\text{Glu}(c)) - \text{G}(\text{Cys}(c)) + \text{G}(\text{Cys}(m)) - \text{numDPProton} \cdot \text{RT}(\ln(10^{\text{pH}} \cdot \text{mitochondrial PH}) - \ln(10^{\text{pH}} \cdot \text{Cytosolic PH})) - \text{Faj}(\text{c}(\text{Ata}(m)) - \text{c}(\text{Ata}(c)))$ |                       |
| Gibbs free energy of formation                                                                                                                                                                                                                                                                                                                                      |                       |
| Value                                                                                                                                                                                                                                                                                                                                                               | Units                 |
| $\text{Ata}(m)$ formation (in pH 7.5)                                                                                                                                                                                                                                                                                                                               | -619.7 kJ/mol         |
| $\text{Ata}(c)$ formation (in pH 7.0)                                                                                                                                                                                                                                                                                                                               | -631.1 kJ/mol         |
| Glutathione(m) formation (in pH 7.5)                                                                                                                                                                                                                                                                                                                                | -282.2 kJ/mol         |
| Glutathione(c) formation (in pH 7.0)                                                                                                                                                                                                                                                                                                                                | -287.9 kJ/mol         |
| Charge [z] - based on most abundant species                                                                                                                                                                                                                                                                                                                         |                       |
| Value                                                                                                                                                                                                                                                                                                                                                               | Units                 |
| $\text{z}(\text{Ata}(m))$                                                                                                                                                                                                                                                                                                                                           | -2                    |
| $\text{z}(\text{Ata}(c))$                                                                                                                                                                                                                                                                                                                                           | -1                    |
| Number of protons/hydrogens - based on most abundant species                                                                                                                                                                                                                                                                                                        |                       |
| Value                                                                                                                                                                                                                                                                                                                                                               | Units                 |
| Ata                                                                                                                                                                                                                                                                                                                                                                 | 4                     |
| Glutathione                                                                                                                                                                                                                                                                                                                                                         | 16                    |
| Standard Gibbs free energy of transporter                                                                                                                                                                                                                                                                                                                           |                       |
| Value                                                                                                                                                                                                                                                                                                                                                               | Units                 |
|                                                                                                                                                                                                                                                                                                                                                                     | <b>-14.491 kJ/mol</b> |

| Mitochondrial transport                                                                                                                                                                                                                                                                                         |                           |
|-----------------------------------------------------------------------------------------------------------------------------------------------------------------------------------------------------------------------------------------------------------------------------------------------------------------|---------------------------|
| $\text{Cis}(m) + \text{PEP}(c) \leftrightarrow \text{Cis}(c) + \text{PEP}(m)$                                                                                                                                                                                                                                   |                           |
| $\text{Cis}(m) \leftrightarrow \text{Cis}(c)$                                                                                                                                                                                                                                                                   |                           |
| Standard Gibbs free energy formula                                                                                                                                                                                                                                                                              |                           |
| $\text{G}(\text{Cis}(c)) - \text{G}(\text{Cis}(m)) + \text{G}(\text{PEP}(m)) - \text{G}(\text{PEP}(c)) - \text{numDPProton} \cdot \text{RT}(\ln(10^{\text{pH}} \cdot \text{mitochondrial PH}) - \ln(10^{\text{pH}} \cdot \text{Cytosolic PH})) - \text{Faj}(\text{c}(\text{Cis}(m)) - \text{c}(\text{Cis}(c)))$ |                           |
| Gibbs free energy of formation                                                                                                                                                                                                                                                                                  |                           |
| Value                                                                                                                                                                                                                                                                                                           | Units                     |
| $\text{Cis}(m)$ formation (in pH 7.5)                                                                                                                                                                                                                                                                           | -951.7 kJ/mol             |
| $\text{Cis}(c)$ formation (in pH 7.0)                                                                                                                                                                                                                                                                           | -966 kJ/mol               |
| PEP(m) formation (in pH 7.0)                                                                                                                                                                                                                                                                                    | -1384.4 kJ/mol            |
| PEP(c) formation (in pH 7.0)                                                                                                                                                                                                                                                                                    | -1393.3 kJ/mol            |
| Charge [z] - based on most abundant species                                                                                                                                                                                                                                                                     |                           |
| Value                                                                                                                                                                                                                                                                                                           | Units                     |
| $\text{z}(\text{Cis}(m))$                                                                                                                                                                                                                                                                                       | -3                        |
| $\text{z}(\text{Cis}(c))$                                                                                                                                                                                                                                                                                       | -3                        |
| Number of protons/hydrogens - based on most abundant species                                                                                                                                                                                                                                                    |                           |
| Value                                                                                                                                                                                                                                                                                                           | Units                     |
| Cis                                                                                                                                                                                                                                                                                                             | 5                         |
| PEP                                                                                                                                                                                                                                                                                                             | 2                         |
| Standard Gibbs free energy of transporter                                                                                                                                                                                                                                                                       |                           |
| Value                                                                                                                                                                                                                                                                                                           | Units                     |
|                                                                                                                                                                                                                                                                                                                 | <b>-9.04121209 kJ/mol</b> |

| Mitochondrial transport                                                                                                                                                                                                                                                                                     |                         |
|-------------------------------------------------------------------------------------------------------------------------------------------------------------------------------------------------------------------------------------------------------------------------------------------------------------|-------------------------|
| $\text{Ma}(m) + \text{Ata}(c) \leftrightarrow \text{Ma}(c) + \text{Ata}(m)$                                                                                                                                                                                                                                 |                         |
| $\text{Ma}(m) \leftrightarrow \text{Ma}(c)$                                                                                                                                                                                                                                                                 |                         |
| Standard Gibbs free energy formula                                                                                                                                                                                                                                                                          |                         |
| $\text{G}(\text{Ma}(c)) - \text{G}(\text{Ma}(m)) + \text{G}(\text{Ata}(m)) - \text{G}(\text{Ata}(c)) - \text{numDPProton} \cdot \text{RT}(\ln(10^{\text{pH}} \cdot \text{mitochondrial PH}) - \ln(10^{\text{pH}} \cdot \text{Cytosolic PH})) - \text{Faj}(\text{c}(\text{Ma}(m)) - \text{c}(\text{Ma}(c)))$ |                         |
| Gibbs free energy of formation                                                                                                                                                                                                                                                                              |                         |
| Value                                                                                                                                                                                                                                                                                                       | Units                   |
| $\text{Ma}(m)$ formation (in pH 7.5)                                                                                                                                                                                                                                                                        | -669.3 kJ/mol           |
| $\text{Ma}(c)$ formation (in pH 7.0)                                                                                                                                                                                                                                                                        | -680.7 kJ/mol           |
| $\text{Ata}(m)$ formation (in pH 7.5)                                                                                                                                                                                                                                                                       | -619.7 kJ/mol           |
| $\text{Ata}(c)$ formation (in pH 7.0)                                                                                                                                                                                                                                                                       | -631.1 kJ/mol           |
| Charge [z] - based on most abundant species                                                                                                                                                                                                                                                                 |                         |
| Value                                                                                                                                                                                                                                                                                                       | Units                   |
| $\text{z}(\text{Ma}(m))$                                                                                                                                                                                                                                                                                    | -2                      |
| $\text{z}(\text{Ma}(c))$                                                                                                                                                                                                                                                                                    | -2                      |
| Number of protons/hydrogens - based on most abundant species                                                                                                                                                                                                                                                |                         |
| Value                                                                                                                                                                                                                                                                                                       | Units                   |
| Ma                                                                                                                                                                                                                                                                                                          | 4                       |
| Ata                                                                                                                                                                                                                                                                                                         | 4                       |
| Standard Gibbs free energy of transporter                                                                                                                                                                                                                                                                   |                         |
| Value                                                                                                                                                                                                                                                                                                       | Units                   |
|                                                                                                                                                                                                                                                                                                             | <b>5.2382723 kJ/mol</b> |

| Mitochondrial transport                                                                                                                                                                                                                                                                                     |                         |
|-------------------------------------------------------------------------------------------------------------------------------------------------------------------------------------------------------------------------------------------------------------------------------------------------------------|-------------------------|
| $\text{Ma}(m) + \text{Cis}(c) \leftrightarrow \text{Ma}(c) + \text{Cis}(m)$                                                                                                                                                                                                                                 |                         |
| $\text{Ma}(m) \leftrightarrow \text{Ma}(c)$                                                                                                                                                                                                                                                                 |                         |
| Standard Gibbs free energy formula                                                                                                                                                                                                                                                                          |                         |
| $\text{G}(\text{Ma}(c)) - \text{G}(\text{Ma}(m)) + \text{G}(\text{Cis}(m)) - \text{G}(\text{Cis}(c)) - \text{numDPProton} \cdot \text{RT}(\ln(10^{\text{pH}} \cdot \text{mitochondrial PH}) - \ln(10^{\text{pH}} \cdot \text{Cytosolic PH})) - \text{Faj}(\text{c}(\text{Ma}(m)) - \text{c}(\text{Ma}(c)))$ |                         |
| Gibbs free energy of formation                                                                                                                                                                                                                                                                              |                         |
| Value                                                                                                                                                                                                                                                                                                       | Units                   |
| $\text{Ma}(m)$ formation (in pH 7.5)                                                                                                                                                                                                                                                                        | -669.3 kJ/mol           |
| $\text{Ma}(c)$ formation (in pH 7.0)                                                                                                                                                                                                                                                                        | -680.7 kJ/mol           |
| $\text{Cis}(m)$ formation (in pH 7.5)                                                                                                                                                                                                                                                                       | -619.7 kJ/mol           |
| $\text{Cis}(c)$ formation (in pH 7.0)                                                                                                                                                                                                                                                                       | -666 kJ/mol             |
| Charge [z] - based on most abundant species                                                                                                                                                                                                                                                                 |                         |
| Value                                                                                                                                                                                                                                                                                                       | Units                   |
| $\text{z}(\text{Ma}(m))$                                                                                                                                                                                                                                                                                    | -2                      |
| $\text{z}(\text{Ma}(c))$                                                                                                                                                                                                                                                                                    | -2                      |
| Number of protons/hydrogens - based on most abundant species                                                                                                                                                                                                                                                |                         |
| Value                                                                                                                                                                                                                                                                                                       | Units                   |
| Ma                                                                                                                                                                                                                                                                                                          | 4                       |
| Cis                                                                                                                                                                                                                                                                                                         | 5                       |
| Standard Gibbs free energy of transporter                                                                                                                                                                                                                                                                   |                         |
| Value                                                                                                                                                                                                                                                                                                       | Units                   |
|                                                                                                                                                                                                                                                                                                             | <b>4.5101107 kJ/mol</b> |

| Mitochondrial transport                                                                                                                                                                                                                                                                                         |                        |
|-----------------------------------------------------------------------------------------------------------------------------------------------------------------------------------------------------------------------------------------------------------------------------------------------------------------|------------------------|
| $\text{Ata}(m) + \text{Glu}(c) + \text{H}^+(c) \leftrightarrow \text{Ata}(c) + \text{Glu}(m) + \text{H}^+(m)$                                                                                                                                                                                                   |                        |
| $\text{Ata}(m) \leftrightarrow \text{Ata}(c)$                                                                                                                                                                                                                                                                   |                        |
| Standard Gibbs free energy formula                                                                                                                                                                                                                                                                              |                        |
| $\text{G}(\text{Ata}(c)) - \text{G}(\text{Ata}(m)) + \text{G}(\text{Glu}(m)) - \text{G}(\text{Glu}(c)) - \text{numDPProton} \cdot \text{RT}(\ln(10^{\text{pH}} \cdot \text{mitochondrial PH}) - \ln(10^{\text{pH}} \cdot \text{Cytosolic PH})) - \text{Faj}(\text{c}(\text{Ata}(m)) - \text{c}(\text{Ata}(c)))$ |                        |
| Gibbs free energy of formation                                                                                                                                                                                                                                                                                  |                        |
| Value                                                                                                                                                                                                                                                                                                           | Units                  |
| $\text{Ata}(m)$ formation (in pH 7.5)                                                                                                                                                                                                                                                                           | -619.7 kJ/mol          |
| $\text{Ata}(c)$ formation (in pH 7.0)                                                                                                                                                                                                                                                                           | -631.1 kJ/mol          |
| $\text{Glu}(m)$ formation (in pH 7.0)                                                                                                                                                                                                                                                                           | -454.6 kJ/mol          |
| $\text{Glu}(c)$ formation (in pH 7.0)                                                                                                                                                                                                                                                                           | -368.6 kJ/mol          |
| $\text{H}^+(m)$ formation (in pH 7.0)                                                                                                                                                                                                                                                                           | -368.3 kJ/mol          |
| Charge [z] - based on most abundant species                                                                                                                                                                                                                                                                     |                        |
| Value                                                                                                                                                                                                                                                                                                           | Units                  |
| $\text{z}(\text{Ata}(m))$                                                                                                                                                                                                                                                                                       | -1                     |
| $\text{z}(\text{Ata}(c))$                                                                                                                                                                                                                                                                                       | -1                     |
| $\text{z}(\text{H}^+(m))$                                                                                                                                                                                                                                                                                       | 1                      |
| Number of protons/hydrogens - based on most abundant species                                                                                                                                                                                                                                                    |                        |
| Value                                                                                                                                                                                                                                                                                                           | Units                  |
| Ata                                                                                                                                                                                                                                                                                                             | 6                      |
| Glu                                                                                                                                                                                                                                                                                                             | 8                      |
| H+                                                                                                                                                                                                                                                                                                              | 1                      |
| Standard Gibbs free energy of transporter                                                                                                                                                                                                                                                                       |                        |
| Value                                                                                                                                                                                                                                                                                                           | Units                  |
|                                                                                                                                                                                                                                                                                                                 | <b>-17.4112 kJ/mol</b> |

| Mitochondrial transport                                                                                                                                                                                                                                 |                        |
|---------------------------------------------------------------------------------------------------------------------------------------------------------------------------------------------------------------------------------------------------------|------------------------|
| $\text{Py}(m) + \text{H}^+(m) \leftrightarrow \text{Py}(c) + \text{H}^+(c)$                                                                                                                                                                             |                        |
| $\text{Py}(m) \leftrightarrow \text{Py}(c)$                                                                                                                                                                                                             |                        |
| Standard Gibbs free energy formula                                                                                                                                                                                                                      |                        |
| $\text{G}(\text{Py}(c)) - \text{G}(\text{Py}(m)) - \text{numDPProton} \cdot \text{RT}(\ln(10^{\text{pH}} \cdot \text{mitochondrial PH}) - \ln(10^{\text{pH}} \cdot \text{Cytosolic PH})) - \text{Faj}(\text{c}(\text{Py}(m)) - \text{c}(\text{Py}(c)))$ |                        |
| Gibbs free energy of formation                                                                                                                                                                                                                          |                        |
| Value                                                                                                                                                                                                                                                   | Units                  |
| $\text{Py}(m)$ formation (in pH 7.5)                                                                                                                                                                                                                    | -437.5 kJ/mol          |
| $\text{Py}(c)$ formation (in pH 7.0)                                                                                                                                                                                                                    | -337.3 kJ/mol          |
| Charge [z] - based on most abundant species                                                                                                                                                                                                             |                        |
| Value                                                                                                                                                                                                                                                   | Units                  |
| $\text{z}(\text{Py}(m))$                                                                                                                                                                                                                                | -1                     |
| $\text{z}(\text{Py}(c))$                                                                                                                                                                                                                                | -1                     |
| Number of protons/hydrogens - based on most abundant species                                                                                                                                                                                            |                        |
| Value                                                                                                                                                                                                                                                   | Units                  |
| Py                                                                                                                                                                                                                                                      | 3                      |
| Standard Gibbs free energy of transporter                                                                                                                                                                                                               |                        |
| Value                                                                                                                                                                                                                                                   | Units                  |
|                                                                                                                                                                                                                                                         | <b>-9.91111 kJ/mol</b> |

| Mitochondrial transport                                                                                                                                                                                                                                 |                        |
|---------------------------------------------------------------------------------------------------------------------------------------------------------------------------------------------------------------------------------------------------------|------------------------|
| $\text{Py}(m) + \text{H}^+(m) \leftrightarrow \text{Py}(c) + \text{H}^+(c)$                                                                                                                                                                             |                        |
| $\text{Py}(m) \leftrightarrow \text{Py}(c)$                                                                                                                                                                                                             |                        |
| Standard Gibbs free energy formula                                                                                                                                                                                                                      |                        |
| $\text{G}(\text{Py}(c)) - \text{G}(\text{Py}(m)) - \text{numDPProton} \cdot \text{RT}(\ln(10^{\text{pH}} \cdot \text{mitochondrial PH}) - \ln(10^{\text{pH}} \cdot \text{Cytosolic PH})) - \text{Faj}(\text{c}(\text{Py}(m)) - \text{c}(\text{Py}(c)))$ |                        |
| Gibbs free energy of formation                                                                                                                                                                                                                          |                        |
| Value                                                                                                                                                                                                                                                   | Units                  |
| $\text{Py}(m)$ formation (in pH 7.5)                                                                                                                                                                                                                    | -437.5 kJ/mol          |
| $\text{Py}(c)$ formation (in pH 7.0)                                                                                                                                                                                                                    | -337.3 kJ/mol          |
| Charge [z] - based on most abundant species                                                                                                                                                                                                             |                        |
| Value                                                                                                                                                                                                                                                   | Units                  |
| $\text{z}(\text{Py}(m))$                                                                                                                                                                                                                                | -1                     |
| $\text{z}(\text{Py}(c))$                                                                                                                                                                                                                                | -1                     |
| Number of protons/hydrogens - based on most abundant species                                                                                                                                                                                            |                        |
| Value                                                                                                                                                                                                                                                   | Units                  |
| Py                                                                                                                                                                                                                                                      | 3                      |
| Standard Gibbs free energy of transporter                                                                                                                                                                                                               |                        |
| Value                                                                                                                                                                                                                                                   | Units                  |
|                                                                                                                                                                                                                                                         | <b>-9.91111 kJ/mol</b> |

**Supplementary Table 12. Previously published co-factor ratios in cytosol and mitochondria**

| NAD <sup>+</sup> /NADH [c] | Reference                                                                                                                                                                                                                                                                                                                                    |
|----------------------------|----------------------------------------------------------------------------------------------------------------------------------------------------------------------------------------------------------------------------------------------------------------------------------------------------------------------------------------------|
| 6.7                        | Chen, W. W., Freinkman, E., Wang, T., Birsoy, K., & Sabatini, D. M. (2016). Absolute Quantification of Matrix Metabolites Reveals the Dynamics of Mitochondrial Metabolism. <i>Cell</i> . <a href="https://doi.org/10.1016/j.cell.2016.07.040">https://doi.org/10.1016/j.cell.2016.07.040</a>                                                |
| 725                        | Krebs, H. A. (1967). The redox state of nicotinamide adenine dinucleotide in the cytoplasm and mitochondria of rat liver. <i>Advances in Enzyme Regulation</i> . <a href="https://doi.org/10.1016/0065-2571(67)90029-5">https://doi.org/10.1016/0065-2571(67)90029-5</a>                                                                     |
| 88                         | Sun, F., Dai, C., Xie, J., & Hu, X. (2012). Biochemical issues in estimation of cytosolic free NAD/NADH ratio. <i>PLoS ONE</i> . <a href="https://doi.org/10.1371/journal.pone.0034525">https://doi.org/10.1371/journal.pone.0034525</a>                                                                                                     |
| 1000                       | Hedekov, C. J., Capito, K., & Thams, P. (1987). Cytosolic ratios of free [NADPH]/[NADP <sup>+</sup> ] and [NADH]/[NAD <sup>+</sup> ] in mouse pancreatic islets, and nutrient-induced insulin secretion. <i>The Biochemical Journal</i> , 241(1), 161–167. <a href="https://doi.org/10.1042/bj2410161">https://doi.org/10.1042/bj2410161</a> |
| 800                        | Zhao, Y., Hu, Q., Cheng, F., Su, N., Wang, A., Zou, Y., ... Yang, Y. (2015). SoNar, a Highly Responsive NAD <sup>+</sup> /NADH Sensor, Allows High-Throughput Metabolic Screening of Anti-tumor Agents. <i>Cell Metabolism</i> . <a href="https://doi.org/10.1016/j.cmet.2015.04.009">https://doi.org/10.1016/j.cmet.2015.04.009</a>         |

  

| NAD <sup>+</sup> /NADH [m] | Reference                                                                                                                                                                                                                                                                                                          |
|----------------------------|--------------------------------------------------------------------------------------------------------------------------------------------------------------------------------------------------------------------------------------------------------------------------------------------------------------------|
| 67                         | Lee, W. D., Mukha, D., Aizenshtein, E., & Shlomi, T. (2019). Spatial-fluxomics provides a subcellular-compartmentalized view of reductive glutamine metabolism in cancer cells. <i>Nature Communications</i> . <a href="https://doi.org/10.1038/s41467-019-09352-1">https://doi.org/10.1038/s41467-019-09352-1</a> |
| 111                        | Chen, W. W., Freinkman, E., Wang, T., Birsoy, K., & Sabatini, D. M. (2016). Absolute Quantification of Matrix Metabolites Reveals the Dynamics of Mitochondrial Metabolism. <i>Cell</i> . <a href="https://doi.org/10.1016/j.cell.2016.07.040">https://doi.org/10.1016/j.cell.2016.07.040</a>                      |
| 8                          | Krebs, H. A. (1967). The redox state of nicotinamide adenine dinucleotide in the cytoplasm and mitochondria of rat liver. <i>Advances in Enzyme Regulation</i> . <a href="https://doi.org/10.1016/0065-2571(67)90029-5">https://doi.org/10.1016/0065-2571(67)90029-5</a>                                           |
| 60                         | Siess, E. A., Brocks, D. G., Lattke, H. K., & Wieland, O. H. (1977). Effect of glucagon on metabolite compartmentation in isolated rat liver cells during gluconeogenesis from lactate. <i>Biochemical Journal</i> . <a href="https://doi.org/10.1042/bj1660225">https://doi.org/10.1042/bj1660225</a>             |

  

| NADP <sup>+</sup> /NADPH [c] | Reference                                                                                                                                                                                                                                                                                                                                    |
|------------------------------|----------------------------------------------------------------------------------------------------------------------------------------------------------------------------------------------------------------------------------------------------------------------------------------------------------------------------------------------|
| 0.03                         | Hedekov, C. J., Capito, K., & Thams, P. (1987). Cytosolic ratios of free [NADPH]/[NADP <sup>+</sup> ] and [NADH]/[NAD <sup>+</sup> ] in mouse pancreatic islets, and nutrient-induced insulin secretion. <i>The Biochemical Journal</i> , 241(1), 161–167. <a href="https://doi.org/10.1042/bj2410161">https://doi.org/10.1042/bj2410161</a> |
| 0.01                         | Veech, R. L., Eggleston, L. V., & Krebs, H. A. (1969). The redox state of free nicotinamide-adenine dinucleotide phosphate in the cytoplasm of rat liver. <i>The Biochemical Journal</i> , 115(4), 609–619. <a href="https://doi.org/10.1042/bj1150609a">https://doi.org/10.1042/bj1150609a</a>                                              |
| 0.038                        | Siess, E. A., Brocks, D. G., Lattke, H. K., & Wieland, O. H. (1977). Effect of glucagon on metabolite compartmentation in isolated rat liver cells during gluconeogenesis from lactate. <i>Biochemical Journal</i> . <a href="https://doi.org/10.1042/bj1660225">https://doi.org/10.1042/bj1660225</a>                                       |
| 0.0133                       | Sallin, O., Reymond, L., Gondrand, C., Raith, F., Koch, B., & Johnsson, K. (2018). Semisynthetic biosensors for mapping cellular concentrations of nicotinamide adenine dinucleotides. <i>ELife</i> . <a href="https://doi.org/10.7554/eLife.32638">https://doi.org/10.7554/eLife.32638</a>                                                  |

  

| NADP <sup>+</sup> /NADPH [m] | Reference                                                                                                                                                                                                                                                                                                                                                                    |
|------------------------------|------------------------------------------------------------------------------------------------------------------------------------------------------------------------------------------------------------------------------------------------------------------------------------------------------------------------------------------------------------------------------|
| 0.012                        | SIES, H., AKERBOOM, T. P. M., & TAGER, J. M. (1977). Mitochondrial and Cytosolic NADPH Systems and Isocitrate Dehydrogenase Indicator Metabolites during Ureogenesis from Ammonia in Isolated Rat Hepatocytes. <i>European Journal of Biochemistry</i> . <a href="https://doi.org/10.1111/j.1432-1033.1977.tb11253.x">https://doi.org/10.1111/j.1432-1033.1977.tb11253.x</a> |
| 0.005                        | Sallin, O., Reymond, L., Gondrand, C., Raith, F., Koch, B., & Johnsson, K. (2018). Semisynthetic biosensors for mapping cellular concentrations of nicotinamide adenine dinucleotides. <i>ELife</i> . <a href="https://doi.org/10.7554/eLife.32638">https://doi.org/10.7554/eLife.32638</a>                                                                                  |

**Supplementary Table 13. Metabolite measured concentrations for 24 h and 48 h incubation period in HeLa cells [mM].**

| Metabolite  | Measured concentration -<br>24 hours (Lower bound) | Measured concentration -<br>24 hours (Upper bound) | Measured concentration - 48<br>hours (Lower bound) | Measured concentration -<br>48 hours (Upper bound) |
|-------------|----------------------------------------------------|----------------------------------------------------|----------------------------------------------------|----------------------------------------------------|
| 13BPG       | 0.00067                                            | 0.0033                                             | 0.0013                                             | 0.0017                                             |
| Glc6P       | 0.022                                              | 0.071                                              | 0.015                                              | 0.07                                               |
| Fumarate    | 0.033                                              | 0.097                                              | 0.089                                              | 0.12                                               |
| 3PG         | 0.13                                               | 0.17                                               | 0.15                                               | 0.16                                               |
| Citrate     | 0.15                                               | 0.24                                               | 0.18                                               | 0.27                                               |
| R5P         | 0.21                                               | 0.33                                               | 0.16                                               | 0.39                                               |
| Malate      | 0.27                                               | 0.41                                               | 0.44                                               | 0.61                                               |
| Lactate     | 0.28                                               | 0.44                                               | 0.44                                               | 0.8                                                |
| Alanine     | 0.28                                               | 0.51                                               | 0.51                                               | 0.68                                               |
| ADP         | 0.28                                               | 0.52                                               | 0.5                                                | 0.53                                               |
| G3P         | 0.49                                               | 0.65                                               | 0.9                                                | 1.24                                               |
| GTP         | 0.54                                               | 0.7                                                | 0.84                                               | 1.1                                                |
| Aspartate   | 1.11                                               | 1.75                                               | 1.97                                               | 2.53                                               |
| ATP         | 0.89                                               | 3.97                                               | 3.04                                               | 3.24                                               |
| Glutamate   | 9.4                                                | 14.6                                               | 12.94                                              | 14.83                                              |
| Glutathione | 8.53                                               | 15.27                                              | 10.6                                               | 11.4                                               |
| Glutamine   | 11.64                                              | 15.56                                              | 14.17                                              | 14.63                                              |

Supplementary Table 14. The fractional labeling of metabolites when feeding HeLa cells with [U-13C]-glucose and [U-13C]-glutamine for 24 h and 48 h, using pHilic method.

| Metabolite        | Mass-isotopomer | Glutamine 24h<br>(measured mean -<br>raw data) | Glutamine 24h<br>(measured SD) | Glutamine 48h<br>(measured mean -<br>raw data) | Glutamine 48h<br>(measured SD) | Glucose 24h<br>(measured mean -<br>raw data) | Glucose 24h<br>(measured SD) | Glucose - 48<br>(measured mean -<br>raw data) | Glucose 48h<br>(measured SD) |
|-------------------|-----------------|------------------------------------------------|--------------------------------|------------------------------------------------|--------------------------------|----------------------------------------------|------------------------------|-----------------------------------------------|------------------------------|
| Lactate           | M+0             | 0.96                                           | 0.001                          | 0.96                                           | 0                              | 0.04                                         | 0.002                        | 0.06                                          | 0.04                         |
| Lactate           | M+1             | 0.03                                           | 0.001                          | 0.03                                           | 0                              | 0                                            | 0                            | 0                                             | 0.001                        |
| Lactate           | M+2             | 0                                              | 0                              | 0                                              | 0                              | 0.03                                         | 0.002                        | 0.03                                          | 0.003                        |
| Lactate           | M+3             | 0.01                                           | 0                              | 0.01                                           | 0                              | 0.93                                         | 0.001                        | 0.91                                          | 0.04                         |
| PEP               | M+0             | 0.97                                           | 0.003                          | 0.97                                           | 0.003                          | 0.03                                         | 0.009                        | 0.02                                          | 0.002                        |
| PEP               | M+1             | 0.03                                           | 0.003                          | 0.03                                           | 0.003                          | 0                                            | 0                            | 0                                             | 0                            |
| PEP               | M+2             | 0                                              | 0                              | 0                                              | 0                              | 0                                            | 0                            | 0                                             | 0                            |
| PEP               | M+3             | 0                                              | 0                              | 0                                              | 0                              | 0.97                                         | 0.009                        | 0.98                                          | 0.002                        |
| AKG               | M+0             | 0.03                                           | 0                              | 0.02                                           | 0.002                          | 0.94                                         | 0.003                        | 0.96                                          | 0.001                        |
| AKG               | M+1             | 0                                              | 0                              | 0                                              | 0                              | 0.05                                         | 0.001                        | 0.01                                          | 0                            |
| AKG               | M+2             | 0.01                                           | 0.013                          | 0                                              | 0                              | 0.01                                         | 0.003                        | 0.03                                          | 0.003                        |
| AKG               | M+3             | 0.02                                           | 0.003                          | 0.03                                           | 0.002                          | 0                                            | 0                            | 0                                             | 0.001                        |
| AKG               | M+4             | 0.03                                           | 0.004                          | 0.03                                           | 0.003                          | 0                                            | 0                            | 0                                             | 0                            |
| AKG               | M+5             | 0.91                                           | 0.012                          | 0.92                                           | 0.004                          | 0                                            | 0.001                        | 0                                             | 0.001                        |
| Glutamine         | M+0             | 0.01                                           | 0.001                          | 0.01                                           | 0.004                          | 0.95                                         | 0                            | 0.95                                          | 0                            |
| Glutamine         | M+1             | 0                                              | 0                              | 0                                              | 0                              | 0.05                                         | 0                            | 0.05                                          | 0                            |
| Glutamine         | M+2             | 0                                              | 0                              | 0                                              | 0                              | 0                                            | 0                            | 0                                             | 0                            |
| Glutamine         | M+3             | 0                                              | 0                              | 0                                              | 0                              | 0                                            | 0                            | 0                                             | 0                            |
| Glutamine         | M+4             | 0.04                                           | 0                              | 0.01                                           | 0.01                           | 0                                            | 0                            | 0                                             | 0                            |
| Glutamine         | M+5             | 0.95                                           | 0.001                          | 0.98                                           | 0.01                           | 0                                            | 0                            | 0                                             | 0                            |
| Glutamate         | M+0             | 0.03                                           | 0.002                          | 0.02                                           | 0.007                          | 0.93                                         | 0.001                        | 0.93                                          | 0.001                        |
| Glutamate         | M+1             | 0                                              | 0                              | 0                                              | 0                              | 0.05                                         | 0.001                        | 0.05                                          | 0.001                        |
| Glutamate         | M+2             | 0                                              | 0                              | 0                                              | 0                              | 0.02                                         | 0                            | 0.02                                          | 0.001                        |
| Glutamate         | M+3             | 0.02                                           | 0                              | 0.02                                           | 0.001                          | 0                                            | 0                            | 0                                             | 0                            |
| Glutamate         | M+4             | 0.03                                           | 0.001                          | 0.01                                           | 0.01                           | 0                                            | 0                            | 0                                             | 0                            |
| Glutamate         | M+5             | 0.92                                           | 0.002                          | 0.95                                           | 0.02                           | 0                                            | 0                            | 0                                             | 0                            |
| Aspartate         | M+0             | 0.13                                           | 0                              | 0.13                                           | 0                              | 0.82                                         | 0.003                        | 0.83                                          | 0.003                        |
| Aspartate         | M+1             | 0.01                                           | 0.001                          | 0.01                                           | 0.001                          | 0.04                                         | 0.001                        | 0.04                                          | 0.001                        |
| Aspartate         | M+2             | 0.03                                           | 0.001                          | 0.03                                           | 0.001                          | 0.03                                         | 0                            | 0.03                                          | 0                            |
| Aspartate         | M+3             | 0.23                                           | 0.002                          | 0.23                                           | 0.002                          | 0.11                                         | 0.002                        | 0.1                                           | 0.002                        |
| Aspartate         | M+4             | 0.6                                            | 0.003                          | 0.6                                            | 0.003                          | 0                                            | 0                            | 0                                             | 0                            |
| CarAsp            | M+0             | 0.12                                           | 0.01                           | 0.14                                           | 0.003                          | 0.84                                         | 0.017                        | 0.83                                          | 0.01                         |
| CarAsp            | M+1             | 0.01                                           | 0.003                          | 0.01                                           | 0.004                          | 0.05                                         | 0.008                        | 0.04                                          | 0.005                        |
| CarAsp            | M+2             | 0.02                                           | 0.004                          | 0.03                                           | 0.01                           | 0                                            | 0                            | 0.01                                          | 0.006                        |
| CarAsp            | M+3             | 0.19                                           | 0.012                          | 0.21                                           | 0.01                           | 0.11                                         | 0.009                        | 0.12                                          | 0.01                         |
| CarAsp            | M+4             | 0.66                                           | 0.02                           | 0.61                                           | 0.003                          | 0                                            | 0                            | 0                                             | 0                            |
| CarAsp            | M+5             | 0                                              | 0.001                          | 0                                              | 0                              | 0                                            | 0                            | 0                                             | 0                            |
| Malate            | M+0             | 0.12                                           | 0.003                          | 0.14                                           | 0.005                          | 0.85                                         | 0.009                        | 0.82                                          | 0.005                        |
| Malate            | M+1             | 0.01                                           | 0.001                          | 0.01                                           | 0                              | 0.04                                         | 0.001                        | 0.04                                          | 0.002                        |
| Malate            | M+2             | 0.02                                           | 0.002                          | 0.03                                           | 0.001                          | 0.02                                         | 0.001                        | 0.03                                          | 0.001                        |
| Malate            | M+3             | 0.2                                            | 0.001                          | 0.22                                           | 0.003                          | 0.09                                         | 0.009                        | 0.11                                          | 0.004                        |
| Malate            | M+4             | 0.65                                           | 0.004                          | 0.6                                            | 0.001                          | 0                                            | 0                            | 0                                             | 0                            |
| R5P               | M+0             | 0.95                                           | 0.008                          | 0.94                                           | 0.003                          | 0                                            | 0.004                        | 0                                             | 0.001                        |
| R5P               | M+1             | 0.05                                           | 0.008                          | 0.05                                           | 0.003                          | 0                                            | 0                            | 0                                             | 0                            |
| R5P               | M+2             | 0                                              | 0                              | 0.01                                           | 0                              | 0.01                                         | 0.002                        | 0.01                                          | 0.003                        |
| R5P               | M+3             | 0                                              | 0                              | 0                                              | 0                              | 0.01                                         | 0.002                        | 0.01                                          | 0.003                        |
| R5P               | M+4             | 0                                              | 0                              | 0                                              | 0                              | 0.05                                         | 0.002                        | 0.05                                          | 0.002                        |
| R5P               | M+5             | 0                                              | 0                              | 0                                              | 0                              | 0.93                                         | 0.01                         | 0.93                                          | 0.01                         |
| 6phosphogluconate | M+0             |                                                |                                |                                                |                                | 0.06                                         | 0.038                        | 0.02                                          | 0.004                        |
| 6phosphogluconate | M+1             |                                                |                                |                                                |                                | 0                                            | 0.002                        | 0                                             | 0                            |
| 6phosphogluconate | M+2             |                                                |                                |                                                |                                | 0                                            | 0                            | 0                                             | 0                            |
| 6phosphogluconate | M+3             |                                                |                                |                                                |                                | 0                                            | 0                            | 0                                             | 0                            |
| 6phosphogluconate | M+4             |                                                |                                |                                                |                                | 0                                            | 0.001                        | 0                                             | 0.001                        |
| 6phosphogluconate | M+5             |                                                |                                |                                                |                                | 0.1                                          | 0.003                        | 0.13                                          | 0.01                         |
| 6phosphogluconate | M+6             |                                                |                                |                                                |                                | 0.84                                         | 0.04                         | 0.85                                          | 0.01                         |

**Supplementary Table 15. Quantifying metabolite concentrations using chemical standard.****Mixture 1 (concentration of metabolites in media solution)**

| Compound                                  | Cat.No. (Manufacturer)            | Concentration, mM |
|-------------------------------------------|-----------------------------------|-------------------|
| L-Alanine                                 | 41-239-25 (Biological Industries) | 50                |
| L-Aspartic acid                           | 41-216-25 (Biological Industries) | 25                |
| Citric acid (monohydrate)                 | C7129-100G (Sigma-Aldrich)        | 50                |
| Fumaric acid (disodium salt)              | F1506-25G (Sigma-Aldrich)         | 50                |
| D-(+)-Glucose                             | G8720-100G (Sigma-Aldrich)        | 50                |
| L-Glutamic acid                           | 41-217-25 (Biological Industries) | 50                |
| L-Glutamine                               | 41-218-25 (Biological Industries) | 50                |
| L-(+)-Lactic acid                         | L1750-10G (Sigma-Aldrich)         | 50                |
| Pyruvic acid (sodium salt)                | P2256-25G (Sigma-Aldrich)         | 50                |
| Succinic acid (disodium salt hexahydrate) | S2378-100G                        | 50                |

**Mixture 2 (concentration of intercellular metabolites)**

| Compound                               | Cat.No. (Manufacturer)            | Concentration, mM |
|----------------------------------------|-----------------------------------|-------------------|
| Adenosine diphosphate (sodium salt)    | A2754-100MG (Sigma-Aldrich)       | 50                |
| L-Alanine                              | 41-239-25 (Biological Industries) | 50                |
| L-Asparagine (monohydrate)             | 41-215-25 (Biological Industries) | 50                |
| L-Aspartic acid                        | 41-216-25 (Biological Industries) | 25                |
| Adenosine triphosphate (disodium salt) | A26209-1G (Sigma-Aldrich)         | 50                |
| Guanosine diphosphate (sodium salt)    | G7127-10MG (Sigma-Aldrich)        | 50                |
| L-Glutamic acid                        | 41-217-25 (Biological Industries) | 50                |
| L-Glutamine                            | 41-218-25 (Biological Industries) | 50                |
| Guanosine triphosphate (disodium salt) | G8877-10MG (Sigma-Aldrich)        | 50                |
| L-Proline                              | 41-221-25 (Biological Industries) | 50                |

**Mixture 3 (concentration of intercellular metabolites)**

| Compound                                            | Cat.No. (Manufacturer)     | Concentration, mM |
|-----------------------------------------------------|----------------------------|-------------------|
| Citric acid (monohydrate)                           | C7129-100G (Sigma-Aldrich) | 50                |
| Fumaric acid (disodium salt)                        | F1506-25G (Sigma-Aldrich)  | 50                |
| $\alpha$ -Ketoglutaric acid (disodium salt hydrate) | K3752-5G (Sigma-Aldrich)   | 50                |
| L-(-)-Malic acid                                    | M1000-100G (Sigma-Aldrich) | 50                |
| Oxaloacetic acid                                    | O4126-1G (Sigma-Aldrich)   | 50                |
| Succinic acid (disodium salt hexahydrate)           | S2378-100G (Sigma-Aldrich) | 50                |
| Succinyl-coenzyme A (sodium salt)                   | S1129-5MG (Sigma-Aldrich)  | 50                |

**Mixture 4 (concentration of intercellular metabolites)**

| Compound                                    | Cat.No. (Manufacturer)    | Concentration, mM |
|---------------------------------------------|---------------------------|-------------------|
| Acetyl-coenzyme A (sodium salt)             | A2056-5MG (Sigma-Aldrich) | 50                |
| D-Glucose 6-phosphate (sodium salt)         | G7879-500MG               | 50                |
| DL-Glyceraldehyde 3-phosphate (sodium salt) | G5251-25MG                | 50                |

|                                              |                        |    |
|----------------------------------------------|------------------------|----|
| Phosphoenolpyruvic acid (potassium salt)     | 10108294001 (Merck)    | 50 |
| D-(-)-3-Phosphoglyceric acid (disodium salt) | sc-214793 (Santa Cruz) | 50 |
| 6-Phosphogluconic acid (trisodium salt)      | P7877-100MG            | 50 |
| D-Ribose 5-phosphate (disodium salt hydrate) | R7750-10MG             | 50 |

#### Mixture 5 (concentration of intercellular metabolites for HILIC method)

| Compound                     | Cat.No. (Manufacturer)            | Concentration, mM |
|------------------------------|-----------------------------------|-------------------|
| L-Alanine                    | 41-239-25 (Biological Industries) | 50                |
| L-Asparagine (monohydrate)   | 41-215-25 (Biological Industries) | 50                |
| Fumaric acid (disodium salt) | F1506-25G (Sigma-Aldrich)         | 50                |
| L-(-)-Malic acid             | M1000-100G (Sigma-Aldrich)        | 50                |

#### Mixture 6 (concentration of intercellular metabolites for HILIC method (SIM))

| Compound                                  | Cat.No. (Manufacturer)     | Concentration, mM |
|-------------------------------------------|----------------------------|-------------------|
| Acetyl-coenzyme A (sodium salt)           | A2056-5MG (Sigma-Aldrich)  | 0.05              |
| Coenzyme A (sodium salt hydrate)          | C4780-25MG (Sigma-Aldrich) | 0.05              |
| Phosphoenolpyruvic acid (potassium salt)  | 10108294001 (Merck)        | 0.05              |
| 6-Phosphogluconic acid (trisodium salt)   | P7877-100MG                | 0.25              |
| Pyruvic acid (sodium salt)                | P2256-25G (Sigma-Aldrich)  | 50                |
| Succinic acid (disodium salt hexahydrate) | S2378-100G (Sigma-Aldrich) | 0.25              |
| Succinyl-coenzyme A (sodium salt)         | S1129-5MG (Sigma-Aldrich)  | 0.05              |
